# Supplementary material for: End-of-life outcomes with or without early palliative care: a propensity score matched, population-based cancer cohort study
Source: PubMed Central journal article supplement — BMJ Open. 2021 Feb 12;11(2):e041432. doi: 10.1136/bmjopen-2020-041432 (PMC7883853; doi:10.1136/bmjopen-2020-041432), 2021-02-12
Supplement: bmjopen-2020-041432.draft_revisions.pdf [file bmjopen-2020-041432.draft_revisions.pdf]

# BMJ Open

BMJ Open is committed to open peer review. As part of this commitment we make the peer review history of every article we publish publicly available.

When an article is published we post the peer reviewers' comments and the authors' responses online. We also post the versions of the paper that were used during peer review. These are the versions that the peer review comments apply to.

The versions of the paper that follow are the versions that were submitted during the peer review process. They are not the versions of record or the final published versions. They should not be cited or distributed as the published version of this manuscript.

BMJ Open is an open access journal and the full, final, typeset and author-corrected version of record of the manuscript is available on our site with no access controls, subscription charges or pay-per-view fees (<http://bmjopen.bmj.com>).

If you have any questions on BMJ Open's open peer review process please email [info.bmjopen@bmj.com](mailto:info.bmjopen@bmj.com)

# BMJ Open

## End-of-life outcomes with or without early palliative care: A propensity-score matched, population-based cancer cohort study

|                               |                                                                                                                                                                                                                                                                                                                                                                                                                                                                                                                                                                                                                                                                    |
|-------------------------------|--------------------------------------------------------------------------------------------------------------------------------------------------------------------------------------------------------------------------------------------------------------------------------------------------------------------------------------------------------------------------------------------------------------------------------------------------------------------------------------------------------------------------------------------------------------------------------------------------------------------------------------------------------------------|
| Journal:                      | <i>BMJ Open</i>                                                                                                                                                                                                                                                                                                                                                                                                                                                                                                                                                                                                                                                    |
| Manuscript ID                 | bmjopen-2020-041432                                                                                                                                                                                                                                                                                                                                                                                                                                                                                                                                                                                                                                                |
| Article Type:                 | Original research                                                                                                                                                                                                                                                                                                                                                                                                                                                                                                                                                                                                                                                  |
| Date Submitted by the Author: | 08-Jun-2020                                                                                                                                                                                                                                                                                                                                                                                                                                                                                                                                                                                                                                                        |
| Complete List of Authors:     | Seow, Hsien; McMaster University, Oncology; McMaster University Sutradhar, Rinku; Institute for Clinical Evaluative Sciences, ; University of Toronto, Dalla Lana School of Public Health<br>Burge, Fred ; Dalhousie University, Family Medicine<br>McGrail, Kimberlyn; University of British Columbia, School of Population and Public Health<br>Guthrie, Dawn; Wilfrid Laurier University<br>Lawson, Beverley; Dalhousie University, Family Medicine<br>Oz, Urun Erbas; Institute for Clinical Evaluative Sciences<br>Chan, Kelvin; Sunnybrook Health Sciences Centre<br>Peacock, Stuart; British Columbia Cancer Agency<br>Barbera, Lisa; University of Calgary |
| Keywords:                     | PALLIATIVE CARE, HEALTH SERVICES ADMINISTRATION & MANAGEMENT, ONCOLOGY                                                                                                                                                                                                                                                                                                                                                                                                                                                                                                                                                                                             |
|                               |                                                                                                                                                                                                                                                                                                                                                                                                                                                                                                                                                                                                                                                                    |

SCHOLARONE™  
Manuscripts

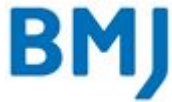

I, the Submitting Author has the right to grant and does grant on behalf of all authors of the Work (as defined in the below author licence), an exclusive licence and/or a non-exclusive licence for contributions from authors who are: i) UK Crown employees; ii) where BMJ has agreed a CC-BY licence shall apply, and/or iii) in accordance with the terms applicable for US Federal Government officers or employees acting as part of their official duties; on a worldwide, perpetual, irrevocable, royalty-free basis to BMJ Publishing Group Ltd ("BMJ") its licensees and where the relevant Journal is co-owned by BMJ to the co-owners of the Journal, to publish the Work in this journal and any other BMJ products and to exploit all rights, as set out in our [licence](#).

The Submitting Author accepts and understands that any supply made under these terms is made by BMJ to the Submitting Author unless you are acting as an employee on behalf of your employer or a postgraduate student of an affiliated institution which is paying any applicable article publishing charge ("APC") for Open Access articles. Where the Submitting Author wishes to make the Work available on an Open Access basis (and intends to pay the relevant APC), the terms of reuse of such Open Access shall be governed by a Creative Commons licence – details of these licences and which [Creative Commons](#) licence will apply to this Work are set out in our licence referred to above.

Other than as permitted in any relevant BMJ Author's Self Archiving Policies, I confirm this Work has not been accepted for publication elsewhere, is not being considered for publication elsewhere and does not duplicate material already published. I confirm all authors consent to publication of this Work and authorise the granting of this licence.

**Title:** End-of-life outcomes with or without early palliative care: A propensity-score matched, population-based cancer cohort study

**Authors' Names:**

1. Hsien Seow (0000-0001-6701-1714),
2. Rinku Sutradhar (0000-0002-0320-6042),
3. Fred Burge (0000-0001-8130-4644),
4. Kimberlyn McGrail (0000-0002-9349-1915),
5. Dawn M. Guthrie (0000-0003-3241-6580),
6. Beverley Lawson (0000-0003-3069-1730),
7. Urun Erbas Oz (0000-0003-1274-5715),
8. Kelvin KW Chan (0000-0002-2501-3057),
9. Stuart J Peacock (0000-0002-8243-8721),
10. Lisa C Barbera (0000-0002-8302-4117)

**Authors' Addresses and Positions:**

1. Hsien Seow (Associate Professor, McMaster University, Department of Oncology, Hamilton, ON);
2. Rinku Sutradhar (Senior Core Scientist, Institute for Clinical Evaluative Sciences, Toronto, ON);
3. Fred Burge (Professor, Dalhousie University, Department of Family Medicine, Halifax, NS);
4. Kimberlyn McGrail (Associate Professor, University of British Columbia, School of Population and Public Health, Vancouver, BC);
5. Dawn M. Guthrie (Professor, Wilfrid Laurier University, Department of Health Sciences, Waterloo, ON);
6. Beverley Lawson (Senior Research Associate, Dalhousie University, Department of Family Medicine, Halifax, NS);
7. Urun Erbas Oz (Senior Statistical Analyst, Institute for Clinical Evaluative Sciences, Toronto, ON);
8. Kelvin KW Chan (Associate Professor, University of Toronto, Department of Medicine, Toronto, ON);
9. Stuart J Peacock (Co-Director, British Columbia Cancer Agency);
10. Lisa C Barbera (Professor, University of Calgary, Department of Oncology, Calgary, AB)

**Correspondence to:** Hsien Seow, PhD, Associate Professor, Department of Oncology, McMaster University, 699 Concession St, 4th Fl, Rm 4-229, Hamilton, Ontario, L8V 5C2  
P: 905-387-9711, Ext. 67175, F: 905-575-6308; E: [seowh@mcmaster.ca](mailto:seowh@mcmaster.ca)

**Contributors:** HS, LB and RS conceived the hypothesis, acquired the data, and designed the analysis plan. UEO performed the analyses. HS wrote the manuscript. All authors interpreted the data, critically revised the manuscript for important intellectual content, and approved the final manuscript. HS, UEO and RS had full access to all of the data in the study and can take responsibility for the integrity of the data and the accuracy of the data analysis. The corresponding author attests that all listed authors meet authorship criteria and that no others meeting the criteria have been omitted.

**Copyright/License for Publication:** The Corresponding Author has the right to grant on behalf of all authors and does grant on behalf of all authors, a worldwide licence to the Publishers and its licensees in perpetuity, in all forms, formats and media (whether known now or created in the future), to i) publish, reproduce, distribute, display and store the Contribution, ii) translate the Contribution into other languages, create adaptations, reprints, include within collections and create summaries, extracts

1  
2  
3 and/or, abstracts of the Contribution, iii) create any other derivative work(s) based on the Contribution,  
4 iv) to exploit all subsidiary rights in the Contribution, v) the inclusion of electronic links from the  
5 Contribution to third party material where-ever it may be located; and, vi) licence any third party to do  
6 any or all of the above."  
7

8  
9 **Competing Interests Declaration:** All authors have completed the ICMJE uniform disclosure form at  
10 [www.icmje.org/coi\\_disclosure.pdf](http://www.icmje.org/coi_disclosure.pdf) and declare: no support from any organisation for the submitted  
11 work; no financial relationships with any organisations that might have an interest in the submitted  
12 work in the previous three years; no other relationships or activities that could appear to have  
13 influenced the submitted work.  
14

15  
16 **Acknowledgments:** The authors would like to acknowledge the following people for their feedback  
17 during the preparation of this manuscript: Erin O'Leary and Reka Petaky.  
18

19 **Ethics:** The study was approved by the Hamilton Integrated Research Ethics Board (#3039).  
20

21 **Funding Statement and Declaration:** This work is funded by the Canadian Centre for Applied Research in  
22 Cancer Control (ARCC). ARCC receives core funding from the Canadian Cancer Society Research Institute  
23 (grant #2015-703549). The lead author is also supported by the Canada Research Chairs program. The  
24 study used databases maintained by the Institute for Clinical Evaluative Sciences, which receives funding  
25 from the Ontario Ministry of Health and Long Term Care. The opinions, results, and conclusions reported  
26 in this paper are those of the authors and are independent from the funding and data providing sources.  
27  
28

29 **Transparency Statement:** The lead author (the manuscript's guarantor) affirms that the manuscript is an  
30 honest, accurate, and transparent account of the study being reported; that no important aspects of the  
31 study have been omitted; and that any discrepancies from the study as originally planned (and, if  
32 relevant, registered) have been explained. All authors had full access to all of the data (including  
33 statistical reports and tables) in the study and can take responsibility for the integrity of the data and  
34 the accuracy of the data analysis  
35  
36

37 **Data Sharing statement:** Data may be obtained from a third party and are not publicly available. A data  
38 request can be sent to ICES (formerly the Institute for Clinical Evaluative Sciences):  
39 <https://www.ices.on.ca/About-ICES/ICES-Contacts-and-Locations/contact-form>  
40

41 **Short title/Running head:** Early palliative care in a cancer population

42 **Word count:** 2467 words; **Abstract:** 254 words  
43  
44  
45  
46  
47  
48  
49  
50  
51  
52  
53  
54  
55  
56  
57  
58  
59  
60

**ABSTRACT:**

**Objectives:** To investigate whether cancer decedents who received palliative care early (i.e. >6 months before death) and not-early had different risk of using hospital care and supportive home care in the last month of life.

**Design / Setting:** We identified a population-based cohort of cancer decedents between 2004 and 2014 in Ontario, Canada using linked administrative data.

**Participants:** We propensity-score matched decedents on receiving early or not-early palliative care using billing claims. We created two groups of matched pairs: one that had Resident Assessment Instrument (RAI) home care assessments in the exposure period (Yes-RAI group) and one that did not (No-RAI group) to control for confounders uniquely available in the assessment, such as health instability and pain. The outcomes were the absolute risk difference between matched pairs in receiving hospital care, supportive home care, or hospital death.

**Results:** In the No-RAI group, we identified 36,238 pairs who received early and not-early palliative care. Those in the early palliative care group vs. not-early group had a lower absolute risk difference of dying in hospital (-10.0%) and receiving hospital care (-10.4%), and a higher absolute risk difference of receiving supportive home care (23.3%). In the Yes-RAI group, we identified 3,586 pairs, where results were similar in magnitude and direction.

**Conclusions:** Cancer decedents who received palliative care earlier than six months before death compared to those who did not had a lower absolute risk difference of receiving hospital care and dying in hospital, and an increased absolute risk difference of receiving supportive home care in the last month of life.

### Strengths and limitations of this study

- This large population-based cohort study of all cancer decedents in Ontario, Canada from 2004-2014 uses consistent exposure and outcome definitions over a long period of time, which provides high external validity in real-world settings.
- The study used propensity scores to match decedents who received palliative care earlier than six months before death compared to those who did not, thereby reducing selection bias among those who receive early palliative care.
- Our study included and controlled for previously unmeasured confounders known to be associated with receipt of early palliative care (i.e. worse pain, ADL dependency, depression, cognitive decline, and health instability) derived from home care assessment data.
- The study matches those who have similar propensity to have received early palliative care, but this may not represent the entire population of cancer decedents.
- The study does not directly measure patient preferences, which is a confounder for use of early palliative care.

## INTRODUCTION

Early palliative care is purported to improve quality of life and also avoid unnecessary acute care use, and thus reduce health system costs. There is a cancer clinical practice guideline that supports the early integration of palliative care with standard oncologic care.<sup>1,2</sup> Yet data shows palliative care is often applied very late in the disease trajectory or not at all. For example in Ontario, Canada, palliative care is used in 50% of all deaths for a median of 30 days before death.<sup>3</sup> US statistics are very similar.<sup>4</sup>

Several randomized trials on advanced cancer patients have shown that early palliative care reduced symptoms and some even had survival benefits.<sup>5-7</sup> However, the evidence is mixed as to whether it reduces health services utilization outcomes at end-of-life. There are trials that show that resource utilization at end of life is not different from “usual care.” In particular, many of the trials implemented palliative care interventions close to diagnosis in controlled study settings, which is difficult to implement in the real-world. For example, the US Medicare Hospice Benefit uses an expected death within six months.<sup>8</sup> Additionally, many observational studies have found positive associations between early palliative care and reduced likelihood to receive aggressive care at end of life (e.g. reduced hospitalizations and hospital deaths).<sup>9-14</sup> However, observational studies are limited by selection bias, namely those who get early palliative care may be different from those who do not (e.g. sicker or more symptomatic in ways that are unmeasured). This is summarized in a large systematic review on early palliative care interventions, which found mixed evidence of benefits and noted key methodological issues of selection bias, as well as when ‘early’ began, the interventions, and usual care definitions varied.<sup>15</sup> Thus the evidence that early palliative care reduces late-life acute care use (particularly when it does not begin at diagnosis) is unclear. This gap has important health resource planning and economic implications.

This study investigated the impact of receiving palliative care early (at least six months before death) vs. not-early on outcomes in the last 30 days of life. By examining cancer patients in the universal health system of Ontario, Canada, we are able to address prior limitations, namely standardizing definitions for ‘early’ palliative care, usual care, and the palliative care



1  
2  
3 intervention. We used propensity-score matching to reduce selection bias in observational  
4 cohorts around receipt of early palliative care.  
5  
6  
7

## 8 **METHODS**

### 9 **Study Design and Data Sources**

10 We performed a population-based, retrospective cohort study of all cancer decedents in  
11 Ontario, Canada from 2004-2014. We utilized propensity score matching to match decedents  
12 having received palliative care early (i.e., between 12 and six months before death) to those  
13 who did not (i.e. received palliative care late or not at all). We linked administrative databases  
14 housed at ICES (formally known as the Institute for Clinical Evaluative Sciences) including the:  
15 Ontario Cancer Registry (cancer diagnosis), Vital Statistics Registry (death date), Discharge  
16 Abstract Database (hospitalizations), National Ambulatory Care Reporting System (Emergency  
17 Department use), physician billings, Statistics Canada (sociodemographic data like income and  
18 rurality), and the Home Care Database, which includes all Resident Assessment Instrument-  
19 Home Care (RAI-HC) assessments. Datasets were linked using unique encoded identifiers and  
20 analyzed at ICES.  
21  
22  
23  
24  
25  
26  
27  
28  
29  
30  
31

### 32 **Study Population**

33 We included decedents who had a cancer diagnosis in the Ontario Cancer Registry and a  
34 death caused by cancer as per the provincial Vital Statistics registry.  
35  
36  
37

### 38 **Exposure**

39 In the exposure period (i.e. between 12 and six months before death), access to early  
40 palliative care was defined as having received: homecare with an end-of-life intent, a physician  
41 consult for palliative care in an outpatient clinic or home visit setting, or a hospitalization where  
42 palliative care was listed as the main reason for admission, as per prior research.<sup>3</sup> Once a  
43 patient was identified as having received early palliative care, they remained in the exposed  
44 group for analysis.  
45  
46  
47  
48  
49  
50

### 51 **Outcomes**

52 Outcomes were death in an acute care bed, and the aggregate measures of aggressive  
53 care and supportive home care in the last 30 days of life respectively. Aggressive care was  
54  
55  
56  
57  
58  
59  
60

1  
2  
3 defined as one or a combination of  $\geq 1$  Emergency Department visit, hospital admission or ICU  
4 admission.<sup>16</sup> Supportive home care was defined as one or a combination of physician house call  
5 for palliative care, end-of-life homecare nursing or end-of-life personal support at home.<sup>17</sup> Each  
6 outcome was handled as a binary variable (Yes/No).  
7  
8  
9

## 10 **Statistical Analysis**

11  
12 To reduce selection bias for decedents who were exposed to early palliative care, we  
13 used propensity score matching to create a similar comparison group of unexposed decedents  
14 (not-early). The propensity score is an individual's probability of receiving early palliative care,  
15 given the values of their baseline measured covariates. Matching on the propensity score can  
16 estimate the effect of the intervention, which is unbiased by differences in the distributions of  
17 measured baseline covariates.<sup>18,19</sup> Our methods matches two individuals who have the same  
18 propensity to receive early palliative care in the exposure period, though one got early  
19 palliative care and one did not.  
20  
21  
22  
23  
24  
25  
26

27 A priori we decided to examine the group who received long stay home care (i.e.,  
28 expected to receive at least 60 days of home care) and thus had a RAI-HC assessment in the  
29 exposure period separately. This allowed us to control for additional confounders associated  
30 with receipt of early palliative care that are uniquely available in the RAI-HC. Therefore, we  
31 created two mutually exclusive groups of matched pairs and each pair consists of an exposed  
32 and unexposed decedent. One group is called the No-RAI group; the other the Yes-RAI group.  
33  
34  
35  
36  
37

38 For the No-RAI group, all pairs were hard matched before the exposure period on: age  
39 at death, sex, cancer type, cancer stage (where available) and the logit of the propensity score  
40 (calipers of width less than or equal to 0.2 of the standard deviation of the logit of the  
41 propensity score).<sup>20,21</sup> We estimated the propensity score using a logistic regression model with  
42 exposure to early palliative care as the independent variable. The predictor variables in the  
43 propensity score regression included: income quintile, rurality, health region, prior hospital  
44 utilization in months 24 to 12 before death, Deyo-modified Charlson comorbidity score in  
45 months 24 to 12 before death, index year of death, and having had radiation or cancer  
46 surgery.<sup>22</sup>  
47  
48  
49  
50  
51  
52  
53  
54  
55  
56  
57  
58  
59  
60

1  
2  
3 For the Yes-RAI group, we utilize additional data from the RAI-HC, which is a  
4 standardized assessment for all long stay home care patients in Ontario, corresponding to the  
5 Minimum Data Set in the US.<sup>23</sup> In addition to matching procedure noted above for the No-RAI  
6 group, pairs were hard matched on health instability using the *Changes in Health, End-stage*  
7 *Disease, Signs and Symptoms (CHESS) scale*.<sup>24,25</sup> The following items were also included in the  
8 propensity score regression: functional performance and dependency using the ADL Self-  
9 performance Hierarchy Scale;<sup>26</sup> depression using the Depression Rating Scale;<sup>27</sup> cognitive  
10 impairment using the Cognitive Performance Scale;<sup>28</sup> pain intensity using the Pain Scale;<sup>29</sup> and  
11 living with a primary or secondary caregiver (Yes/No).

12  
13 Because the distributions of covariates were well-balanced and not statistically different  
14 after matching the exposed and unexposed patients in both the No-RAI and Yes-RAI groups, we  
15 did not need to employ any regression methods for examining the exposure-outcomes  
16 relationship; thus for each outcome, we determined the absolute risk difference between the  
17 matched exposed and unexposed individuals in both Yes-RAI and No-RAI groups.<sup>30</sup> We used  
18 McNemar's test to determine statistical significance of the estimated risk difference.<sup>31</sup>  
19 Differences in risk between the exposure and control groups for each outcome were assessed  
20 using standardized differences. Standardized differences are more appropriate to use in this  
21 population-based study as they are not influenced by sample size (unlike p-values). Analysis  
22 was performed using SAS Enterprise Guide, version 7.1 (SAS Institute, Cary, NC).

23  
24 As a sensitivity analysis, we divided the not-early group—i.e. unexposed group—into  
25 late palliative care (i.e., only received palliative care in the last six months of life) and never  
26 received palliative care. We then compared our outcomes by early vs. late and early vs. never  
27 separately. The study was approved by the Hamilton Integrated Research Ethics Board (#3039).

### 28 **Patient and Public Involvement**

29 Patients and the public were not involved this research.

## 30 **RESULTS**

### 31 **Patients**

1  
2  
3 In the overall cohort, there were 144,306 cancer decedents in Ontario between 2004  
4 and 2014, of which 53,959 (37.4%) received early palliative care 12 to six months before death.  
5 Eighty-nine percent (n=128,248) of the overall cohort did not have a RAI-HC in the exposure  
6 period (No-RAI), who were matched separately than the 11% (n=16,058) who did have the  
7 assessment (Yes-RAI). (Figure 1) Baseline characteristics before propensity score matching are  
8 shown in Table S1 in the Supplementary Appendix, and those after propensity score matching  
9 are shown in Table 1.  
10  
11  
12  
13  
14  
15

16 In the No-RAI group, we matched 82.6% of patients who received early palliative care  
17 for a total of 36,238 matched pairs. After matching, the decedent covariate distributions were  
18 nearly identical between the two groups. For instance, average age was 69, 23.5% had lung  
19 cancer and 14.2% had stage IV disease. In the No-RAI group, the first initiation of early palliative  
20 care was about 300 days before death, of which half were initiated by homecare services and a  
21 third by outpatient physician billings. In the last 6 months of life, the early group received  
22 91,321 palliative care services (30% home care, 33% physician consults and 24% hospital),  
23 whereas the late group received 63,994 palliative care services (25% home care, 35% physician  
24 consults and 29% hospital admissions).  
25  
26  
27  
28  
29  
30  
31

32 In the Yes-RAI group, we matched 59.9% of patients who received homecare but  
33 without end-of-life intent in the exposure period for a total of 3,586 matched pairs. After  
34 matching, the decedent covariate distributions were nearly identical between the two groups.  
35 For instance, 11.8% had moderate to severe health instability using the CHES score, 6.8% were  
36 fully dependent on their ADLs, and 11.0% had moderate-severe pain. In the Yes-RAI group, the  
37 first initiation of early palliative care was about 330 days before death, of which two-thirds  
38 were homecare services. In the last 6 months of life, the early group received 8,484 palliative  
39 care services (same distributions as No-RAI group) whereas the late group received 4,664  
40 palliative care services (16% home care, 38% physician consults and 37% hospital admissions).  
41  
42  
43  
44  
45  
46  
47  
48

### 49 **Aggressive Care**

50  
51 Among matched pairs in the No-RAI group, those who received early palliative care had  
52 lower risk difference of the aggressive care outcomes compared to the not-early group. (Table  
53 2) 38.1% of the early palliative care decedents died in hospital, compared to 48.1% of the non-  
54  
55  
56  
57  
58  
59  
60

1  
2  
3 early palliative care group, resulting in a lower absolute risk difference of 10.0%. Similarly, the  
4 aggregate measure of aggressive care was lower by 10.4% among early palliative care  
5 decedents. The early palliative care decedents have a lower absolute risk difference of an  
6 Emergency Department visit (9.7%), hospital admission (10.1%), and ICU admission (4.4%) in  
7 the last month of life compared to the not-early group.  
8  
9

10  
11  
12 Among matched pairs in the Yes-RAI groups, we found similar results in the direction  
13 and magnitude of the absolute risk differences favoring early palliative care. Note, McNemar's  
14 tests for matched pairs were significant ( $p < 0.0001$  for all measures). Further, the sensitivity  
15 analyses in the Yes-RAI and No-RAI groups separately, looking at matched pairs of early vs. late  
16 palliative care and early vs. never palliative care respectively, showed that the early palliative  
17 care group consistently had lower absolute risk differences for all outcomes, in similar  
18 magnitudes. (Appendix S2)  
19  
20  
21  
22  
23  
24

### 25 **Supportive Home Care**

26  
27 Among the matched pairs in the No-RAI group, those who received early palliative care  
28 had higher risk of receiving supportive home care outcomes compared to the not-early group.  
29 (Table 3) The aggregate measure of supportive home care was higher by 23% among early  
30 palliative care decedents vs. not-early decedents. 56.2% of the early palliative care decedents  
31 had any end-of-life home care nursing in the last 30 days, compared to 34.0% of the non-early  
32 palliative care group, resulting in a lower absolute risk difference of 22.2%. The early palliative  
33 care decedents have a higher absolute risk of having a physician house call (10.2%) and an end-  
34 of-life personal support worker in the last month of life (16.0%) vs. not-early decedents.  
35  
36  
37  
38  
39  
40

41  
42 Among the matched pairs in the Yes-RAI groups, we found similar trends in direction,  
43 but at larger magnitudes: a 37.8% higher absolute risk difference of having any one of the three  
44 supportive home care outcomes. Note, McNemar's tests for matched pairs were significant ( $p$   
45  $< 0.0001$  for all measures). Further the sensitivity analyses, examining early vs. late and early vs.  
46 never palliative care matched pairs separately, showed that early palliative care consistently  
47 had higher absolute risk differences for all outcomes. (Appendix S3)  
48  
49  
50  
51  
52  
53

## 54 **DISCUSSION**

1  
2  
3 In our population-based cohort of 114,306 cancer decedents, a propensity score  
4 matched cohort of those who received palliative care earlier than six months before death  
5 compared to those who did not had a lower absolute risk difference of receiving hospital care  
6 and dying in hospital, and an increased absolute risk difference of receiving supportive home  
7 care in the last month of life. While prior randomized trials provided high internal validity  
8 within controlled settings, our approach provides high external validity in real-world settings.  
9 Bolstering the credibility that early palliative care is beneficial is the consistency of our findings  
10 across 2004-2014, which predate the publication of seminal randomized trials;<sup>5-7</sup> and the use of  
11 a population-based cancer cohort, meaning the findings were not a result of a particular cancer  
12 centre, intervention program, or cancer type.  
13  
14

15  
16 This study addressed some of the noted gaps in prior research: it uses consistent  
17 exposure and outcome definitions over a long period of time and uses a large population-based  
18 cohort of all cancer types. Moreover, by using data from the RAI-HC, our study was able to  
19 control for previously unmeasured confounders known to be associated with receipt of early  
20 palliative care, such as worse pain, ADL dependency, depression, cognitive decline, and health  
21 instability. This seeks to address selection bias in prior observational studies where those  
22 receiving palliative care might be different (e.g. worse symptoms or have worse health  
23 instability) than those who do not. Our results were consistent with and without matching for  
24 RAI-HC variables. To address patient preferences, we conducted a sensitivity analysis to  
25 examine early vs. late and early vs. never subgroups separately. The hypotheses were that the  
26 late subgroup were willing to receive palliative care but were offered it late and the never  
27 subgroup were more likely to refuse palliative care. In both subgroups, the findings were  
28 consistent with our overall study results, further supporting the benefits of early palliative care.  
29  
30  
31  
32  
33  
34  
35  
36  
37  
38  
39  
40  
41  
42  
43  
44

45 Our study has limitations. The propensity score matched design means we are  
46 comparing amongst those who are likely to have received early palliative care, but this may not  
47 represent the entire population of cancer decedents. We do not directly measure patient  
48 preferences, which would be useful to control for in future studies. As well, future research  
49 should examine outcomes of health system costs or patient and caregiver well-being.  
50  
51  
52  
53  
54  
55  
56  
57  
58  
59  
60

In conclusion, across an 11-year population-based, cancer cohort, those who received early palliative care (before six months of death) compared to a matched cohort of those who did not, were more likely to receive supportive home care and less likely to receive hospital care in the last month of life.

**Table 1. Demographics of Early vs. Not-Early Palliative Care**

|                                                | After propensity score matching        |                                    |      |                                       |                                   |      |
|------------------------------------------------|----------------------------------------|------------------------------------|------|---------------------------------------|-----------------------------------|------|
|                                                | No-RAI                                 |                                    |      | Yes-RAI                               |                                   |      |
|                                                | Not Early Palliative Care (N = 36,238) | Early Palliative Care (N = 36,238) | SD   | Not Early Palliative Care (N = 3,586) | Early Palliative Care (N = 3,568) | SD   |
| <b>Variables that were Hard Matched</b>        | <b>N (%)</b>                           | <b>N (%)</b>                       |      | <b>N (%)</b>                          | <b>N (%)</b>                      |      |
| Female                                         | 17,702 (48.8)                          | 17,702 (48.8)                      | 0.00 | 1,826 (50.9)                          | 1,826 (50.9)                      | 0.00 |
| Cancer Type at Diagnosis                       |                                        |                                    |      |                                       |                                   |      |
| Breast                                         | 4,126 (11.4)                           | 4,126 (11.4)                       | 0.00 | 433 (12.1)                            | 433 (12.1)                        | 0.00 |
| Colorectal                                     | 5,266 (14.5)                           | 5,266 (14.5)                       | 0.00 | 722 (20.1)                            | 722 (20.1)                        | 0.00 |
| Hematology                                     | 2,982 (8.2)                            | 2,982 (8.2)                        | 0.00 | 479 (13.4)                            | 479 (13.4)                        | 0.00 |
| Lung                                           | 8,530 (23.5)                           | 8,530 (23.5)                       | 0.00 | 548 (15.3)                            | 548 (15.3)                        | 0.00 |
| Prostate                                       | 3,053 (8.4)                            | 3,053 (8.4)                        | 0.00 | 486 (13.6)                            | 486 (13.6)                        | 0.00 |
| Stage at Diagnosis                             |                                        |                                    |      |                                       |                                   |      |
| Stage III                                      | 3,726 (10.3)                           | 3,726 (10.3)                       | 0.00 | 275 (7.7)                             | 275 (7.7)                         | 0.00 |
| Stage IV                                       | 5,151 (14.2)                           | 5,151 (14.2)                       | 0.00 | 329 (9.2)                             | 329 (9.2)                         | 0.00 |
| Unavailable                                    | 24,631 (68.0)                          | 24,631 (68.0)                      | 0.00 | 2,749 (76.7)                          | 2,749 (76.7)                      | 0.00 |
| CHESS Score (when RAI-HC completed)            |                                        |                                    |      |                                       |                                   |      |
| No health instability                          | -                                      | -                                  | -    | 921 (25.7)                            | 921 (25.7)                        | 0.00 |
| Low health instability                         | -                                      | -                                  | -    | 2,242 (62.5)                          | 2,242 (62.5)                      | 0.00 |
| Moderate health instability                    | -                                      | -                                  | -    | 380 (10.6)                            | 380 (10.6)                        | 0.00 |
| Severe health instability                      | -                                      | -                                  | -    | 43 (1.2)                              | 43 (1.2)                          | 0.00 |
| <b>Variables within the Propensity Score</b>   |                                        |                                    |      |                                       |                                   |      |
| Lowest income quintile                         | 7,058 (19.5)                           | 7,146 (19.7)                       | 0.01 | 776 (21.6)                            | 790 (22.0)                        | 0.01 |
| Highest income quintile                        | 7,102 (19.6)                           | 7,130 (19.7)                       | 0.00 | 626 (17.5)                            | 622 (17.3)                        | 0.00 |
| Lives in Rural Community                       | 5,206 (14.4)                           | 5,236 (14.4)                       | 0.00 | 579 (16.1)                            | 568 (15.8)                        | 0.01 |
| Deyo-Charlson Comorbidity Score (>=1)          | 12,026 (33.2)                          | 12,540 (34.6)                      | 0.03 | 1,483 (41.4)                          | 1,426 (39.8)                      | 0.08 |
| Had Radiation since diagnosis                  | 22,337 (61.6)                          | 21,982 (60.7)                      | 0.02 | 1,894 (52.8)                          | 1,950 (54.4)                      | 0.03 |
| Had Cancer Surgery since diagnosis             | 16,339 (45.1)                          | 15,701 (43.3)                      | 0.04 | 1,780 (49.6)                          | 1,716 (47.9)                      | 0.04 |
| <b>InterRAI Scales (When RAI-HC completed)</b> |                                        |                                    |      |                                       |                                   |      |
| Dependent on Activities of Daily Living        | -                                      | -                                  | -    | 241 (6.7)                             | 247 (6.9)                         | 0.01 |
| Minor-major depression                         | -                                      | -                                  | -    | 496 (13.8)                            | 429 (10.0)                        | 0.06 |

|                                      |   |   |   |              |              |      |
|--------------------------------------|---|---|---|--------------|--------------|------|
| Moderate-severe cognitive impairment | - | - | - | 373 (10.4)   | 363 (10.1)   | 0.01 |
| Moderate-severe pain                 | - | - | - | 391 (10.9)   | 398 (11.1)   | 0.01 |
| Caregiver Present at Home            | - | - | - | 2,279 (63.6) | 2,264 (63.1) | 0.01 |

For peer review only



**Table 2: Aggressive care measures in decedents with or without a RAI assessment**

|                                                                 | NO-RAI                                  |                                             |                                                       |      | YES-RAI                                |                                            |                                                       |      |
|-----------------------------------------------------------------|-----------------------------------------|---------------------------------------------|-------------------------------------------------------|------|----------------------------------------|--------------------------------------------|-------------------------------------------------------|------|
|                                                                 | Early Palliative Care<br>N = 36,238 (%) | Not Early Palliative Care<br>N = 36,238 (%) | Absolute Risk Difference (%)<br>(Early vs. Not Early) | SD   | Early Palliative Care<br>N = 3,586 (%) | Not Early Palliative Care<br>N = 3,586 (%) | Absolute Risk Difference (%)<br>(Early vs. Not Early) | SD   |
| Death in acute care hospital                                    | 13,823 (38.1)                           | 17,434 (48.1)                               | -10.0                                                 | 0.21 | 1,278 (35.6)                           | 1,751 (48.8)                               | -13.2                                                 | 0.21 |
| Aggressive care (any one or combination of the following three) | 18,822 (51.9)                           | 22,586 (62.3)                               | -10.4                                                 | 0.21 | 1,718 (47.9)                           | 2,089 (58.3)                               | -10.4                                                 | 0.21 |
| At least 1 ED visits within last 30 days                        | 15,550 (42.9)                           | 19,075 (52.6)                               | -9.7                                                  | 0.21 | 1,454 (40.5)                           | 1,827 (50.9)                               | -10.4                                                 | 0.21 |
| Any hospital admission within last 30 days                      | 16,286 (44.9)                           | 19,918 (55.0)                               | -10.1                                                 | 0.25 | 1,492 (41.6)                           | 1863 (52.0)                                | -10.4                                                 | 0.25 |
| Any ICU admission within last 30 days                           | 1,299 (3.6)                             | 2,889 (8.0)                                 | -4.4                                                  | 0.85 | 83 (2.3)                               | 274 (7.6)                                  | -5.3                                                  | 0.85 |

\*McNemar's test was significant to <0.0001 for all measures

**Table 3: Supportive home care measures in decedents with or without a RAI assessment**

|                                                                      | NO-RAI                                  |                                             |                                                       |      | YES-RAI                                |                                            |                                                       |      |
|----------------------------------------------------------------------|-----------------------------------------|---------------------------------------------|-------------------------------------------------------|------|----------------------------------------|--------------------------------------------|-------------------------------------------------------|------|
|                                                                      | Early Palliative Care<br>N = 36,238 (%) | Not Early Palliative Care<br>N = 36,238 (%) | Absolute Risk Difference (%)<br>(Early vs. Not Early) | SD   | Early Palliative Care<br>N = 3,586 (%) | Not Early Palliative Care<br>N = 3,586 (%) | Absolute Risk Difference (%)<br>(Early vs. Not Early) | SD   |
| Supportive home care (any one or combination of the following three) | 22,191 (61.2)                           | 13,736 (37.9)                               | 23.3                                                  | 0.39 | 2,012 (56.1)                           | 656 (18.3)                                 | 37.8                                                  | 0.39 |
| Physician house call in last 30 days                                 | 9,754 (26.9)                            | 6,061 (16.7)                                | 10.2                                                  | 0.86 | 859 (24.0)                             | 341 (9.5)                                  | 14.5                                                  | 0.86 |
| Palliative homecare nursing at home in last 30 days                  | 20,370 (56.2)                           | 12320 (34.0)                                | 22.2                                                  | 0.73 | 1,822 (50.8)                           | 494 (13.8)                                 | 37.0                                                  | 0.73 |
| Palliative personal support at home in last 30 days                  | 13,728 (37.9)                           | 7,954 (21.9)                                | 16.0                                                  | 0.27 | 1,449 (40.4)                           | 374 (10.4)                                 | 30.0                                                  | 0.27 |

\*McNemar's test was significant to <0.0001 for all measures

## REFERENCES

1. Ferrell BR, Temel JS, Temin S, et al: Integration of Palliative Care Into Standard Oncology Care: ASCO Clinical Practice Guideline Update Summary. *J Oncol Pract* 13:119-121, 2017
2. Smith TJ, Temin S, Alesi ER, et al: American Society of Clinical Oncology provisional clinical opinion: the integration of palliative care into standard oncology care. *J. Clin. Oncol* 30:880-887, 2012
3. Tanuseputro P, Budhwani S, Bai YQ, et al: Palliative care delivery across health sectors: A population-level observational study. *PALLIAT. MED*, 2016
4. National Hospice and Palliative Care Organization. *NHPCO facts and figures: Hospice care in America*. Alexandria, Virginia, 2016
5. Zimmermann C, Swami N, Krzyzanowska M, et al: Early palliative care for patients with advanced cancer: a cluster-randomised controlled trial. *Lancet* 383:1721-1730, 2014
6. Temel JS, Greer JA, Muzikansky A, et al: Early palliative care for patients with metastatic non-small-cell lung cancer. *N Engl J Med* 363:733-742, 2010
7. Bakitas M, Lyons KD, Hegel MT, et al: Effects of a palliative care intervention on clinical outcomes in patients with advanced cancer: the Project ENABLE II randomized controlled trial. *JAMA* 302:741-749, 2009
8. Centers for Medicare & Medicaid Services. *Medicare hospice benefits*. Baltimore, 2013
9. Qureshi D, Tanuseputro P, Perez R, et al: Early initiation of palliative care is associated with reduced late-life acute-hospital use: A population-based retrospective cohort study. *Palliat Med*:269216318815794, 2018
10. McNamara BA, Rosenwax LK, Murray K, et al: Early admission to community-based palliative care reduces use of emergency departments in the ninety days before death. *J. Palliat. Med* 16:774-779, 2013
11. Pellizzari M, Hui D, Pinato E, et al: Impact of intensity and timing of integrated home palliative cancer care on end-of-life hospitalization in Northern Italy. *Support Care Cancer* 25:1201-1207, 2017
12. Wright CM, Youens D, Moorin RE: Earlier Initiation of Community-Based Palliative Care Is Associated With Fewer Unplanned Hospitalizations and Emergency Department Presentations in the Final Months of Life: A Population-Based Study Among Cancer Decedents. *J Pain Symptom Manage* 55:745-754.e8, 2018
13. Seow H, Barbera L, Howell D, et al: Using more end-of-life homecare services is associated with using fewer acute care services: a population-based cohort study. *MED. CARE* 48:118-124, 2010
14. Spilsbury K, Rosenwax L, Arendts G, et al: The impact of community-based palliative care on acute hospital use in the last year of life is modified by time to death, age and underlying cause of death. A population-based retrospective cohort study. *PLoS One* 12:e0185275, 2017
15. Davis MP, Temel JS, Balboni T, et al: A review of the trials which examine early integration of outpatient and home palliative care for patients with serious illnesses. *Ann Palliat Med* 4:99-121, 2015
16. Earle CC, Park ER, Lai B, et al: Identifying potential indicators of the quality of end-of-life cancer care from administrative data. *J Clin Oncol* 21, 2003
17. Warren JL, Barbera L, Bremner KE, et al: End-of-life care for lung cancer patients in the United States and Ontario. *J. Natl. Cancer Inst* 103:853-862, 2011
18. Rosenbaum P, Rubin D: The central role of the propensity score in observational studies for causal effects. *Biometrika* 70:41-55, 1983

19. Rosenbaum P, Rubin D: Constructing a control group using multivariate matched sampling methods that incorporate the propensity score. *The American Statistician* 39:33-38, 1985
20. Austin PC: Balance diagnostics for comparing the distribution of baseline covariates between treatment groups in propensity-score matched samples. *Stat. Med* 28:3083-3107, 2009
21. Austin PC: Type I Error Rates, Coverage of Confidence Intervals, and Variance Estimation in Propensity-Score Matched Analyses. *The International Journal of Biostatistics* 5, 2009
22. Henson LA, Gomes B, Koffman J, et al: Factors associated with aggressive end of life cancer care. *Support Care Cancer* 24:1079-89, 2016
23. Hirdes JP, Ljunggren G, Morris JN, et al: Reliability of the interRAI suite of assessment instruments: a 12-country study of an integrated health information system. *BioMed Central Health Services Research* 8:1-11, 2008
24. Hirdes JP, Poss JW, Mitchell L, et al: Use of the interRAI CHES scale to predict mortality among persons with neurological conditions in three care settings. *PLoS One* 9:e99066, 2014
25. Hirdes JP, Frijters DH, Teare GF: The MDS-CHES scale: a new measure to predict mortality in institutionalized older people. *J Am Geriatr Soc* 51:96-100, 2003
26. Morris JN, Fries BE, Morris SA: Scaling ADLs within the MDS. *J Gerontol A Biol Sci Med Sci* 54A:M546-M553, 1999
27. Burrows AB, Morris JN, Simon SE, et al: Development of an MDS-based depression rating scale for use in nursing homes. *Age Ageing* 29:165-172, 2000
28. Morris JN, Fries BE, Mehr DR, et al: MDS Cognitive Performance Scale. *J Gerontol A Biol Sc Med Sci* 49:M174-M182, 1994
29. Fries BE, Simon SE, Morris JN, et al: Pain in U.S. nursing homes: validating a pain scale for the minimum data set. *Gerontologist* 41:173-9, 2001
30. Austin PC: Primer on statistical interpretation or methods report card on propensity-score matching in the cardiology literature from 2004 to 2006: a systematic review. *Circ Cardiovasc Qual Outcomes* 1:62-7, 2008
31. Austin PC: A critical appraisal of propensity-score matching in the medical literature between 1996 and 2003. *Stat. Med* 27:2037-2049, 2008

1  
2  
3  
4  
5  
6  
7  
8  
9  
10  
11  
12  
13  
14  
15  
16  
17  
18  
19  
20  
21  
22  
23  
24  
25  
26  
27  
28  
29  
30  
31  
32  
33  
34  
35  
36  
37  
38  
39  
40  
41  
42  
43  
44  
45  
46  
47  
48  
49  
50  
51  
52  
53  
54  
55  
56  
57  
58  
59  
60

Figure 1. Consort Diagram

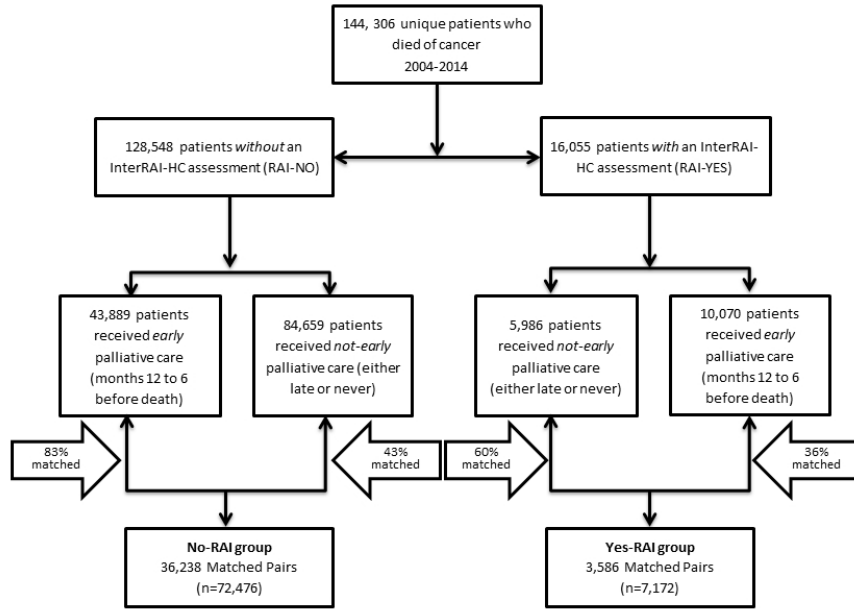

254x190mm (96 x 96 DPI)

### Appendix S1. Demographics of Early vs. Not-Early before Propensity Score Matching

|                                                | Before Propensity Score matching          |                                       | SD   |
|------------------------------------------------|-------------------------------------------|---------------------------------------|------|
|                                                | Not Early Palliative Care<br>(N = 90,347) | Early Palliative Care<br>(N = 53,959) |      |
| <b>Variables that were Hard Matched</b>        | <b>N (%)</b>                              | <b>N (%)</b>                          |      |
| Female                                         | 41,994 (46.5)                             | 27,113 (50.2)                         | 0.59 |
| Cancer Type at Diagnosis                       |                                           |                                       |      |
| Breast                                         | 10,539 (11.7)                             | 5,850 (10.8)                          | 0.03 |
| Colorectal                                     | 12,051 (13.3)                             | 8,579 (15.9)                          | 0.07 |
| Hematology                                     | 10,546 (11.7)                             | 4,150 (7.7)                           | 0.13 |
| Lung                                           | 17,444 (19.3)                             | 13,050 (24.2)                         | 0.12 |
| Prostate                                       | 9,041 (10.0)                              | 4,384 (8.1)                           | 0.07 |
| Stage at Diagnosis                             |                                           |                                       |      |
| Stage III                                      | 6,222 (6.9)                               | 5,858 (10.9)                          | 0.14 |
| Stage IV                                       | 7,347 (8.1)                               | 10,832 (20.1)                         | 0.35 |
| Unavailable                                    | 70,351 (77.9)                             | 32,731 (60.7)                         | 0.38 |
| CHESS Score (when RAI-HC completed)            |                                           |                                       |      |
| No health instability                          | 1,704 (1.9)                               | 2,221 (4.1)                           | 0.13 |
| Low health instability                         | 3,433 (3.8)                               | 5,458 (10.1)                          | 0.25 |
| Moderate health instability                    | 714 (0.8)                                 | 1,761 (3.3)                           | 0.18 |
| Severe health instability                      | 135 (0.1)                                 | 629 (1.2)                             | 0.13 |
| <b>Variables within the Propensity Score</b>   |                                           |                                       |      |
| Lowest income quintile                         | 18,686 (20.7)                             | 10,682 (19.8)                         | 0.02 |
| Highest income quintile                        | 17,154 (19.0)                             | 10,492 (19.4)                         | 0.01 |
| Lives in Rural Community                       | 13,597 (15.0)                             | 7,813 (14.5)                          | 0.02 |
| Deyo-Charlson Comorbidity Score (>=1)          | 13,728 (15.2)                             | 9,553 (17.7)                          | 0.10 |
| Had Radiation since diagnosis                  | 43,298 (47.9)                             | 34,226 (63.4)                         | 0.32 |
| Had Cancer Surgery since diagnosis             | 37,369 (41.4)                             | 23,917 (44.3)                         | 0.59 |
| <b>InterRAI Scales (When RAI-HC completed)</b> |                                           |                                       |      |
| Dependent on Activities of Daily Living        | 433 (0.5)                                 | 684 (1.3)                             | 0.08 |
| Minor-major depression                         | 809 (0.9)                                 | 1,797 (3.3)                           | 0.17 |
| Moderate-severe cognitive impairment           | 869 (1.0)                                 | 764 (1.4)                             | 0.04 |
| Moderate-severe pain                           | 606 (0.7)                                 | 1,457 (2.7)                           | 0.16 |
| Caregiver Present at Home                      | 3528 (3.9)                                | 6,970 (12.9)                          | 0.33 |

**Appendix S2. Aggressive Care Measures comparing Early vs. Late and Early vs. Never**

|                                                                 | RAI NO                |                       |                                                               |      | RAI YES               |                       |                                                               |      |
|-----------------------------------------------------------------|-----------------------|-----------------------|---------------------------------------------------------------|------|-----------------------|-----------------------|---------------------------------------------------------------|------|
|                                                                 | Early Palliative Care | Late Palliative Care  | Absolute Risk Difference (%) (Early vs Late Palliative Care)  | SD   | Early Palliative Care | Late Palliative Care  | Absolute Risk Difference (%) (Early vs Late Palliative Care)  | SD   |
| <b>Late PC vs. Early PC</b>                                     | N = 28,285 (%)        | N = 28,285 (%)        |                                                               |      | N = 2,323 (%)         | N = 2,323 (%)         |                                                               |      |
| Death in acute care hospital                                    | 10,788 (38.1)         | 13,109 (46.3)         | -8.2                                                          | 0.17 | 831 (35.8)            | 1,152 (49.6)          | -13.8                                                         | 0.28 |
| Aggressive care (any one or combination of the following three) | 14,763 (52.2)         | 17,379 (61.4)         | -9.2                                                          | 0.19 | 1,135 (48.9)          | 1,344 (57.9)          | -9.0                                                          | 0.18 |
| At least 1 ED visits within last 30 days                        | 12,232 (43.2)         | 14,552 (51.4)         | -8.2                                                          | 0.16 | 949 (40.9)            | 1,141 (49.1)          | -8.2                                                          | 0.17 |
| Any hospital admission within last 30 days                      | 12,750 (45.1)         | 15,492 (54.8)         | -9.7                                                          | 0.19 | 992 (42.7)            | 1,223 (52.6)          | -9.9                                                          | 0.20 |
| Any ICU admission within last 30 days                           | 1,022 (3.6)           | 1,379 (4.9)           | -1.3                                                          | 0.06 | 53 (2.3)              | 111 (4.8)             | -2.5                                                          | 0.14 |
| <b>Never PC vs. Early PC</b>                                    | Early Palliative Care | Never Palliative Care | Absolute Risk Difference (%) (Early vs Never Palliative Care) | SD   | Early PC              | Never Palliative Care | Absolute Risk Difference (%) (Early vs Never Palliative Care) | SD   |
|                                                                 | N = 7,953 (%)         | N = 7,953 (%)         |                                                               |      | N = 1,263 (%)         | N = 1,263 (%)         |                                                               |      |
| Death in acute care hospital                                    | 3,035 (38.2)          | 4,325 (54.4)          | -16.2                                                         | 0.33 | 447 (35.4)            | 599 (47.4)            | -12.0                                                         | 0.25 |
| Aggressive care (any one or combination of the following three) | 4,059 (51.0)          | 5,207 (65.5)          | -14.5                                                         | 0.30 | 583 (46.2)            | 745 (59.0)            | -12.8                                                         | 0.26 |
| At least 1 ED visits within last 30 days                        | 3,318 (41.7)          | 4,523 (56.9)          | -15.2                                                         | 0.31 | 505 (40.0)            | 686 (54.3)            | -14.3                                                         | 0.29 |
| Any hospital admission within last 30 days                      | 3,536 (44.5)          | 4,426 (55.7)          | -11.2                                                         | 0.23 | 500 (39.6)            | 640 (50.7)            | -11.1                                                         | 0.22 |
| Any ICU admission within last 30 days                           | 277 (3.5)             | 1,510 (19.0)          | -15.5                                                         | 0.51 | 30 (2.4)              | 163 (12.9)            | -10.5                                                         | 0.40 |

\*McNemar's test was significant to <0.0001 for all measures

**Appendix S3. Supportive Home Care Measures comparing Early vs. Late and Early vs. Never**

|                                                                      | RAI NO                |                       |                                                               |      | RAI YES               |                       |                                                               |      |
|----------------------------------------------------------------------|-----------------------|-----------------------|---------------------------------------------------------------|------|-----------------------|-----------------------|---------------------------------------------------------------|------|
|                                                                      | Early Palliative Care | Late Palliative Care  | Absolute Risk Difference (%) (Early vs Late Palliative Care)  | SD   | Early Palliative Care | Late Palliative Care  | Absolute Risk Difference (%) (Early vs Late Palliative Care)  | SD   |
| <b>Late PC vs. Early PC</b>                                          | N = 28,285 (%)        | N = 28,285 (%)        |                                                               |      | N = 2,323 (%)         | N = 2,323 (%)         |                                                               |      |
| Supportive home care (any one or combination of the following three) | 17,552 (62.1)         | 13,736 (48.6)         | 13.5                                                          | 0.27 | 1,340 (57.7)          | 656 (28.2)            | 29.5                                                          | 0.62 |
| Physician house call in last 30 days                                 | 7,833 (27.7)          | 6,061 (21.4)          | 6.3                                                           | 0.15 | 582 (25.1)            | 341 (14.7)            | 10.4                                                          | 0.26 |
| Palliative homecare nursing at home in last 30 days                  | 16,083 (56.9)         | 12,320 (43.6)         | 13.3                                                          | 0.27 | 1,213 (52.2)          | 494 (21.3)            | 30.9                                                          | 0.68 |
| Palliative personal support nursing at home in last 30 days          | 10,745 (38.0)         | 7,954 (28.1)          | 9.9                                                           | 0.21 | 955 (41.4)            | 374 (16.1)            | 25.3                                                          | 0.58 |
| <b>Never PC vs. Early PC</b>                                         | Early Palliative Care | Never Palliative Care | Absolute Risk Difference (%) (Early vs Never Palliative Care) | SD   | Early Palliative Care | Never Palliative Care | Absolute Risk Difference (%) (Early vs Never Palliative Care) | SD   |
|                                                                      | N = 7,953 (%)         | N = 7,953 (%)         |                                                               |      | N = 1,263 (%)         | N = 1,263 (%)         |                                                               |      |
| Supportive home care (any one or combination of the following three) | 4,639 (58.3)          | 0                     | -                                                             | -    | 672 (53.2)            | 0                     | -                                                             | -    |
| Physician house call in last 30 days                                 | 1,921 (24.2)          | 0                     | -                                                             | -    | 277 (21.9)            | 0                     | -                                                             | -    |
| Palliative homecare nursing at home in last 30 days                  | 4,287 (53.9)          | 0                     | -                                                             | -    | 609 (48.2)            | 0                     | -                                                             | -    |
| Palliative personal support nursing at home in last 30 days          | 2,983 (37.5)          | 0                     | -                                                             | -    | 494 (39.1)            | 0                     | -                                                             | -    |

\*McNemar's test was significant to <0.0001 for all measures



## TRIPOD Checklist: Prediction Model Development

| Section/Topic                | Item | Checklist Item                                                                                                                                                                                        | Page                |
|------------------------------|------|-------------------------------------------------------------------------------------------------------------------------------------------------------------------------------------------------------|---------------------|
| <b>Title and abstract</b>    |      |                                                                                                                                                                                                       |                     |
| Title                        | 1    | Identify the study as developing and/or validating a multivariable prediction model, the target population, and the outcome to be predicted.                                                          | 1                   |
| Abstract                     | 2    | Provide a summary of objectives, study design, setting, participants, sample size, predictors, outcome, statistical analysis, results, and conclusions.                                               | 2                   |
| <b>Introduction</b>          |      |                                                                                                                                                                                                       |                     |
| Background and objectives    | 3a   | Explain the medical context (including whether diagnostic or prognostic) and rationale for developing or validating the multivariable prediction model, including references to existing models.      | 3                   |
|                              | 3b   | Specify the objectives, including whether the study describes the development or validation of the model or both.                                                                                     | 3                   |
| <b>Methods</b>               |      |                                                                                                                                                                                                       |                     |
| Source of data               | 4a   | Describe the study design or source of data (e.g., randomized trial, cohort, or registry data), separately for the development and validation data sets, if applicable.                               | 4                   |
|                              | 4b   | Specify the key study dates, including start of accrual; end of accrual; and, if applicable, end of follow-up.                                                                                        | 4                   |
| Participants                 | 5a   | Specify key elements of the study setting (e.g., primary care, secondary care, general population) including number and location of centres.                                                          | 4+5                 |
|                              | 5b   | Describe eligibility criteria for participants.                                                                                                                                                       | 4+5                 |
|                              | 5c   | Give details of treatments received, if relevant.                                                                                                                                                     | 4+5                 |
| Outcome                      | 6a   | Clearly define the outcome that is predicted by the prediction model, including how and when assessed.                                                                                                | 4+5                 |
|                              | 6b   | Report any actions to blind assessment of the outcome to be predicted.                                                                                                                                | 4+5                 |
| Predictors                   | 7a   | Clearly define all predictors used in developing or validating the multivariable prediction model, including how and when they were measured.                                                         | 4+5                 |
|                              | 7b   | Report any actions to blind assessment of predictors for the outcome and other predictors.                                                                                                            | 4+5                 |
| Sample size                  | 8    | Explain how the study size was arrived at.                                                                                                                                                            | 4                   |
| Missing data                 | 9    | Describe how missing data were handled (e.g., complete-case analysis, single imputation, multiple imputation) with details of any imputation method.                                                  | NA                  |
| Statistical analysis methods | 10a  | Describe how predictors were handled in the analyses.                                                                                                                                                 | 5+6                 |
|                              | 10b  | Specify type of model, all model-building procedures (including any predictor selection), and method for internal validation.                                                                         | 4+5                 |
|                              | 10d  | Specify all measures used to assess model performance and, if relevant, to compare multiple models.                                                                                                   | 4+5                 |
| Risk groups                  | 11   | Provide details on how risk groups were created, if done.                                                                                                                                             | 4+5                 |
| <b>Results</b>               |      |                                                                                                                                                                                                       |                     |
| Participants                 | 13a  | Describe the flow of participants through the study, including the number of participants with and without the outcome and, if applicable, a summary of the follow-up time. A diagram may be helpful. | 6, figure 1         |
|                              | 13b  | Describe the characteristics of the participants (basic demographics, clinical features, available predictors), including the number of participants with missing data for predictors and outcome.    | 6+7                 |
| Model development            | 14a  | Specify the number of participants and outcome events in each analysis.                                                                                                                               | 6+7                 |
|                              | 14b  | If done, report the unadjusted association between each candidate predictor and outcome.                                                                                                              | NA                  |
| Model specification          | 15a  | Present the full prediction model to allow predictions for individuals (i.e., all regression coefficients, and model intercept or baseline survival at a given time point).                           | NA                  |
|                              | 15b  | Explain how to use the prediction model.                                                                                                                                                              | NA                  |
| Model performance            | 16   | Report performance measures (with CIs) for the prediction model.                                                                                                                                      | 7+8, 12, tables 2+3 |
| <b>Discussion</b>            |      |                                                                                                                                                                                                       |                     |
| Limitations                  | 18   | Discuss any limitations of the study (such as nonrepresentative sample, few events per predictor, missing data).                                                                                      | 9                   |
| Interpretation               | 19b  | Give an overall interpretation of the results, considering objectives, limitations, and results from similar studies, and other relevant evidence.                                                    | 8-9                 |
| Implications                 | 20   | Discuss the potential clinical use of the model and implications for future research.                                                                                                                 | 9                   |
| <b>Other information</b>     |      |                                                                                                                                                                                                       |                     |
| Supplementary information    | 21   | Provide information about the availability of supplementary resources, such as study protocol, Web calculator, and data sets.                                                                         | 1                   |
| Funding                      | 22   | Give the source of funding and the role of the funders for the present study.                                                                                                                         | 1                   |

We recommend using the TRIPOD Checklist in conjunction with the TRIPOD Explanation and Elaboration document.

# BMJ Open

## End-of-life outcomes with or without early palliative care: A propensity-score matched, population-based cancer cohort study

|                                 |                                                                                                                                                                                                                                                                                                                                                                                                                                                                                                                                                                                                                                                                    |
|---------------------------------|--------------------------------------------------------------------------------------------------------------------------------------------------------------------------------------------------------------------------------------------------------------------------------------------------------------------------------------------------------------------------------------------------------------------------------------------------------------------------------------------------------------------------------------------------------------------------------------------------------------------------------------------------------------------|
| Journal:                        | <i>BMJ Open</i>                                                                                                                                                                                                                                                                                                                                                                                                                                                                                                                                                                                                                                                    |
| Manuscript ID                   | bmjopen-2020-041432.R1                                                                                                                                                                                                                                                                                                                                                                                                                                                                                                                                                                                                                                             |
| Article Type:                   | Original research                                                                                                                                                                                                                                                                                                                                                                                                                                                                                                                                                                                                                                                  |
| Date Submitted by the Author:   | 15-Dec-2020                                                                                                                                                                                                                                                                                                                                                                                                                                                                                                                                                                                                                                                        |
| Complete List of Authors:       | Seow, Hsien; McMaster University, Oncology; McMaster University Sutradhar, Rinku; Institute for Clinical Evaluative Sciences, ; University of Toronto, Dalla Lana School of Public Health<br>Burge, Fred ; Dalhousie University, Family Medicine<br>McGrail, Kimberlyn; University of British Columbia, School of Population and Public Health<br>Guthrie, Dawn; Wilfrid Laurier University<br>Lawson, Beverley; Dalhousie University, Family Medicine<br>Oz, Urun Erbas; Institute for Clinical Evaluative Sciences<br>Chan, Kelvin; Sunnybrook Health Sciences Centre<br>Peacock, Stuart; British Columbia Cancer Agency<br>Barbera, Lisa; University of Calgary |
| <b>Primary Subject Heading</b>: | Palliative care                                                                                                                                                                                                                                                                                                                                                                                                                                                                                                                                                                                                                                                    |
| Secondary Subject Heading:      | Oncology, Health services research                                                                                                                                                                                                                                                                                                                                                                                                                                                                                                                                                                                                                                 |
| Keywords:                       | PALLIATIVE CARE, HEALTH SERVICES ADMINISTRATION & MANAGEMENT, ONCOLOGY, Adult palliative care < PALLIATIVE CARE, PRIMARY CARE                                                                                                                                                                                                                                                                                                                                                                                                                                                                                                                                      |
|                                 |                                                                                                                                                                                                                                                                                                                                                                                                                                                                                                                                                                                                                                                                    |

SCHOLARONE™  
Manuscripts



I, the Submitting Author has the right to grant and does grant on behalf of all authors of the Work (as defined in the below author licence), an exclusive licence and/or a non-exclusive licence for contributions from authors who are: i) UK Crown employees; ii) where BMJ has agreed a CC-BY licence shall apply, and/or iii) in accordance with the terms applicable for US Federal Government officers or employees acting as part of their official duties; on a worldwide, perpetual, irrevocable, royalty-free basis to BMJ Publishing Group Ltd ("BMJ") its licensees and where the relevant Journal is co-owned by BMJ to the co-owners of the Journal, to publish the Work in this journal and any other BMJ products and to exploit all rights, as set out in our [licence](#).

The Submitting Author accepts and understands that any supply made under these terms is made by BMJ to the Submitting Author unless you are acting as an employee on behalf of your employer or a postgraduate student of an affiliated institution which is paying any applicable article publishing charge ("APC") for Open Access articles. Where the Submitting Author wishes to make the Work available on an Open Access basis (and intends to pay the relevant APC), the terms of reuse of such Open Access shall be governed by a Creative Commons licence – details of these licences and which [Creative Commons](#) licence will apply to this Work are set out in our licence referred to above.

Other than as permitted in any relevant BMJ Author's Self Archiving Policies, I confirm this Work has not been accepted for publication elsewhere, is not being considered for publication elsewhere and does not duplicate material already published. I confirm all authors consent to publication of this Work and authorise the granting of this licence.

**Title:** End-of-life outcomes with or without early palliative care: A propensity-score matched, population-based cancer cohort study

**Authors' Names:**

1. Hsien Seow (0000-0001-6701-1714),
2. Rinku Sutradhar (0000-0002-0320-6042),
3. Fred Burge (0000-0001-8130-4644),
4. Kimberlyn McGrail (0000-0002-9349-1915),
5. Dawn M. Guthrie (0000-0003-3241-6580),
6. Beverley Lawson (0000-0003-3069-1730),
7. Urun Erbas Oz (0000-0003-1274-5715),
8. Kelvin KW Chan (0000-0002-2501-3057),
9. Stuart J Peacock (0000-0002-8243-8721),
10. Lisa C Barbera (0000-0002-8302-4117)

**Authors' Addresses and Positions:**

1. Hsien Seow (Associate Professor, McMaster University, Department of Oncology, Hamilton, ON);
2. Rinku Sutradhar (Senior Core Scientist, Institute for Clinical Evaluative Sciences, Toronto, ON);
3. Fred Burge (Professor, Dalhousie University, Department of Family Medicine, Halifax, NS);
4. Kimberlyn McGrail (Associate Professor, University of British Columbia, School of Population and Public Health, Vancouver, BC);
5. Dawn M. Guthrie (Professor, Wilfrid Laurier University, Department of Health Sciences, Waterloo, ON);
6. Beverley Lawson (Senior Research Associate, Dalhousie University, Department of Family Medicine, Halifax, NS);
7. Urun Erbas Oz (Senior Statistical Analyst, Institute for Clinical Evaluative Sciences, Toronto, ON);
8. Kelvin KW Chan (Associate Professor, University of Toronto, Department of Medicine, Toronto, ON);
9. Stuart J Peacock (Co-Director, British Columbia Cancer Agency);
10. Lisa C Barbera (Professor, University of Calgary, Department of Oncology, Calgary, AB)

**Correspondence to:** Hsien Seow, PhD, Associate Professor, Department of Oncology, McMaster University, 699 Concession St, 4th Fl, Rm 4-229, Hamilton, Ontario, L8V 5C2  
P: 905-387-9711, Ext. 67175, F: 905-575-6308; E: [seowh@mcmaster.ca](mailto:seowh@mcmaster.ca)

**Copyright/License for Publication:** The Corresponding Author has the right to grant on behalf of all authors and does grant on behalf of all authors, a worldwide licence to the Publishers and its licensees in perpetuity, in all forms, formats and media (whether known now or created in the future), to i) publish, reproduce, distribute, display and store the Contribution, ii) translate the Contribution into other languages, create adaptations, reprints, include within collections and create summaries, extracts and/or, abstracts of the Contribution, iii) create any other derivative work(s) based on the Contribution, iv) to exploit all subsidiary rights in the Contribution, v) the inclusion of electronic links from the Contribution to third party material where-ever it may be located; and, vi) licence any third party to do any or all of the above."

**Acknowledgments:** The authors would like to acknowledge the following people for their feedback during the preparation of this manuscript: Erin O'Leary and Reka Petaky.

1  
2  
3  
4 **Ethics:** The study was approved by the Hamilton Integrated Research Ethics Board (#3039).  
5

6 **Transparency Statement:** The lead author (the manuscript's guarantor) affirms that the manuscript is an  
7 honest, accurate, and transparent account of the study being reported; that no important aspects of the  
8 study have been omitted; and that any discrepancies from the study as originally planned (and, if  
9 relevant, registered) have been explained. All authors had full access to all of the data (including  
10 statistical reports and tables) in the study and can take responsibility for the integrity of the data and  
11 the accuracy of the data analysis  
12  
13

14 **Short title/Running head:** Early palliative care in a cancer population

15 **Word count:** 3137 words; **Abstract:** 265 words  
16  
17  
18  
19  
20  
21  
22  
23  
24  
25  
26  
27  
28  
29  
30  
31  
32  
33  
34  
35  
36  
37  
38  
39  
40  
41  
42  
43  
44  
45  
46  
47  
48  
49  
50  
51  
52  
53  
54  
55  
56  
57  
58  
59  
60

**ABSTRACT:**

**Objectives:** To investigate whether cancer decedents who received palliative care early (i.e. >6 months before death) and not-early had different risk of using hospital care and supportive home care in the last month of life.

**Design / Setting:** We identified a population-based cohort of cancer decedents between 2004 and 2014 in Ontario, Canada using linked administrative data. Analysis occurred between August 2017 to March 2019.

**Participants:** We propensity-score matched decedents on receiving early or not-early palliative care using billing claims. We created two groups of matched pairs: one that had Resident Assessment Instrument (RAI) home care assessments in the exposure period (Yes-RAI group) and one that did not (No-RAI group) to control for confounders uniquely available in the assessment, such as health instability and pain. The outcomes were the absolute risk difference between matched pairs in receiving hospital care, supportive home care, or hospital death.

**Results:** In the No-RAI group, we identified 36,238 pairs who received early and not-early palliative care. Those in the early palliative care group vs. not-early group had a lower absolute risk difference of dying in hospital (-10.0%) and receiving hospital care (-10.4%), and a higher absolute risk difference of receiving supportive home care (23.3%). In the Yes-RAI group, we identified 3,586 pairs, where results were similar in magnitude and direction.

**Conclusions:** Cancer decedents who received palliative care earlier than six months before death compared to those who did not had a lower absolute risk difference of receiving hospital care and dying in hospital, and an increased absolute risk difference of receiving supportive home care in the last month of life.

### Strengths and limitations of this study

- This large population-based cohort study of all cancer decedents in Ontario, Canada from 2004-2014 uses consistent exposure and outcome definitions over a long period of time, which provides high external validity in real-world settings.
- The study used propensity scores to match decedents who received palliative care earlier than six months before death compared to those who did not, thereby reducing selection bias among those who receive early palliative care.
- Our study included and controlled for previously unmeasured confounders known to be associated with receipt of early palliative care (i.e. worse pain, ADL dependency, depression, cognitive decline, and health instability) derived from home care assessment data.
- The study matches those who have similar propensity to have received early palliative care, but this may not represent the entire population of cancer decedents.
- The study does not directly measure patient preferences, which is a confounder for use of early palliative care.

## INTRODUCTION

Early palliative care is purported to improve quality of life and also avoid unnecessary acute care use, and thus reduce health system costs. Several randomized trials on advanced cancer patients have shown that early palliative care reduced symptoms and some even had survival benefits.<sup>1-3</sup> This evidence led to the oncology clinical practice guideline that supports the early integration of palliative care with standard oncologic care.<sup>4,5</sup> However, the evidence is mixed as to whether it reduces health services utilization outcomes at end-of-life. There are trials that show that resource utilization at end of life is not different from “usual care.”

In particular, many of the trials implemented palliative care interventions close to diagnosis in controlled study settings, which is difficult to implement in the real-world. For example, the United States’ Medicare Hospice Benefit requires a physician to certify an expected death within six months.<sup>6</sup> Additionally, many observational studies have found positive associations between early palliative care and reduced likelihood to receive aggressive care at end of life (e.g. reduced hospitalizations and hospital deaths).<sup>7-12</sup> However, observational studies are limited by selection bias, namely those who get early palliative care may be different from those who do not (e.g. are sicker or more symptomatic in ways that are unmeasured). This is summarized in a large systematic review on early palliative care interventions, which found mixed evidence of benefits and noted key methodological issues of selection bias, as well as large variation in the definitions of when ‘early’ began, the interventions themselves, and usual care.<sup>13</sup> Thus the evidence that early palliative care reduces late-life acute care use (particularly when it does not begin at diagnosis) is unclear. This gap has important health resource planning and economic implications.

By examining cancer patients in the universal health system of Ontario, Canada, we are able to address prior limitations, namely standardizing definitions for ‘early’ palliative care, usual care, and the palliative care intervention. Usual care in Ontario means that cancer patients have access to publicly-subsidized palliative care in the form of: a palliative care outpatient clinic (e.g. multidisciplinary pain and symptom management clinic); palliative home care services by a nurse or personal care worker; or a family doctor providing palliative care via clinic or rarely via home-visit. Generally, these 3 services are independent of one another and



1  
2  
3 uncoordinated.<sup>14</sup> This contrasts the community-based, multidisciplinary team approach of  
4 palliative care delivery found in the United States via home hospice care<sup>6</sup> or in the United  
5 Kingdom via Macmillan cancer support program.<sup>15</sup> Although a small minority of patients might  
6 have access to a multidisciplinary, specialist palliative care team that makes home visits or a  
7 residential hospice, especially if they lived in a major city, this is haphazard and accessed  
8 typically in the last weeks of life.<sup>16</sup> If the patients were hospitalized, they could also receive a  
9 consult from a palliative care doctor individually or a multidisciplinary team (e.g. admitted to a  
10 palliative care unit) in the hospital. Unfortunately, data shows palliative care services are often  
11 used very late in the disease trajectory or not at all. For example in Ontario, Canada, palliative  
12 care services are used in 50% of all deaths for a median of 30 days before death.<sup>17</sup> In the United  
13 States, statistics are very similar, where palliative care via the Medicare Hospice Benefit is used  
14 in 45% of all deaths for a median of 17 days before death.<sup>18</sup>

15  
16 Specifically this study investigated the impact of receiving palliative care early (at least  
17 six months before death) vs. not-early on outcomes in the last 30 days of life. We used  
18 propensity-score matching to reduce selection bias in observational cohorts around receipt of  
19 early palliative care.

## 20 21 22 23 24 25 26 27 28 29 30 31 32 33 34 **METHODS**

### 35 36 **Study Design and Data Sources**

37  
38 We performed a population-based, retrospective cohort study of all cancer decedents in  
39 Ontario, Canada from 2004-2014. We utilized propensity score matching to match decedents  
40 having received palliative care early (i.e., between 12 and six months before death) to those  
41 who did not (i.e. received palliative care late or not at all). We linked administrative databases  
42 housed at ICES (formally known as the Institute for Clinical Evaluative Sciences) including the:  
43 Ontario Cancer Registry (cancer diagnosis), Vital Statistics Registry (death date), Discharge  
44 Abstract Database (hospitalizations), National Ambulatory Care Reporting System (Emergency  
45 Department use), physician billings, Statistics Canada (sociodemographic data like income and  
46 rurality), and the Home Care Database, which includes all Resident Assessment Instrument-

1  
2  
3 Home Care (RAI-HC) assessments. Datasets were linked using unique encoded identifiers and  
4 analyzed at ICES.  
5

### 6 7 **Study Population**

8 We included decedents who had a cancer diagnosis in the Ontario Cancer Registry and a  
9 death caused by cancer as per the provincial Vital Statistics registry. Those whose cancer  
10 diagnosis was 6 months or less from death were excluded as they were not eligible for the  
11 exposure.  
12  
13  
14  
15

### 16 **Exposure**

17 In the exposure period (i.e. between 12 and six months before death),<sup>19</sup> access to early  
18 palliative care was defined as having received: homecare with an palliative care intent; a  
19 physician consult for palliative care in an inpatient admission (including complex continuing  
20 care), outpatient clinic, or a home visit setting; or a hospitalization where palliative care was  
21 listed as the main reason for admission, as per prior research.<sup>17</sup> Once a patient was identified as  
22 having received early palliative care, they remained in the exposed group for analysis.  
23  
24  
25  
26  
27  
28

### 29 **Outcomes**

30 Outcomes were death in an acute care bed, and the aggregate measures of aggressive  
31 care and supportive home care in the last 30 days of life respectively. Aggressive care was  
32 defined as one or a combination of  $\geq 1$  Emergency Department visit, hospital admission or ICU  
33 admission.<sup>20</sup> Supportive home care was defined as one or a combination of physician house call  
34 for palliative care, end-of-life homecare nursing or end-of-life personal support at home.<sup>21</sup> Each  
35 outcome was handled as a binary variable (Yes/No).  
36  
37  
38  
39  
40  
41

### 42 **Statistical Analysis**

43 To reduce selection bias for decedents who were exposed to early palliative care, we  
44 used propensity score matching to create a similar comparison group of unexposed decedents  
45 (not-early). The propensity score is an individual's probability of receiving early palliative care,  
46 given the values of their baseline measured covariates. Matching on the propensity score can  
47 estimate the effect of the intervention, which is unbiased by differences in the distributions of  
48 measured baseline covariates.<sup>22,23</sup> Our methods matches two individuals who have the same  
49  
50  
51  
52  
53  
54  
55  
56  
57  
58  
59  
60

1  
2  
3 propensity to receive early palliative care in the exposure period, though one got early  
4 palliative care and one did not.  
5

6  
7 A priori we decided to examine the group who received long-stay home care services  
8 (i.e., expected to receive at least 60 days of home care) and thus had a RAI-HC assessment in  
9 the exposure period separately. Of note, long-stay home care patients either received standard  
10 homecare (unexposed) or palliative homecare (exposed) services. This allowed us to control for  
11 additional confounders associated with receipt of early palliative care that are uniquely  
12 available in the RAI-HC. Therefore, we created two mutually exclusive groups of matched pairs  
13 and each pair consists of an exposed and unexposed decedent. One group is called the No-RAI  
14 group; the other the Yes-RAI group.  
15

16  
17 For the No-RAI group, all pairs were hard matched before the exposure period on: age  
18 at death, sex, cancer type, cancer stage (where available) and the logit of the propensity score  
19 (calipers of width less than or equal to 0.2 of the standard deviation of the logit of the  
20 propensity score).<sup>24,25</sup> We estimated the propensity score using a logistic regression model with  
21 exposure to early palliative care as the independent variable. The predictor variables in the  
22 propensity score regression included: income quintile, rurality, health region, prior hospital  
23 utilization in months 24 to 12 before death, Deyo-modified Charlson comorbidity score in  
24 months 24 to 12 before death, index year of death, and having had radiation or cancer  
25 surgery.<sup>26</sup>  
26

27  
28 For the Yes-RAI group, we utilize additional data from the RAI-HC, which is a  
29 standardized assessment for all long stay home care patients in Ontario, corresponding to the  
30 Minimum Data Set in the United States.<sup>27</sup> In addition to matching procedure noted above for  
31 the No-RAI group, pairs were hard matched on health instability using the *Changes in Health,*  
32 *End-stage Disease, Signs and Symptoms (CHESS) scale*.<sup>28,29</sup> The following items were also  
33 included in the propensity score regression: functional performance and dependency using the  
34 ADL Self-performance Hierarchy Scale;<sup>30</sup> depression using the Depression Rating Scale;<sup>31</sup>  
35 cognitive impairment using the Cognitive Performance Scale;<sup>32</sup> pain intensity using the Pain  
36 Scale;<sup>33</sup> and living with a primary or secondary caregiver (Yes/No).  
37  
38  
39  
40  
41  
42  
43  
44  
45  
46  
47  
48  
49  
50  
51  
52  
53  
54  
55  
56  
57  
58  
59  
60

1  
2  
3 Because the distributions of covariates were well-balanced and not statistically different  
4 after matching the exposed and unexposed patients in both the No-RAI and Yes-RAI groups, we  
5 did not need to employ any regression methods for examining the exposure-outcomes  
6 relationship; thus for each outcome, we determined the absolute risk difference between the  
7 matched exposed and unexposed individuals in both Yes-RAI and No-RAI groups.<sup>34</sup> We used  
8 McNemar's test to determine statistical significance of the estimated risk difference.<sup>35</sup>  
9 Differences in risk between the exposure and control groups for each outcome were assessed  
10 using standardized differences. Standardized differences are more appropriate to use in this  
11 population-based study as they are not influenced by sample size (unlike p-values). Analysis  
12 was performed using SAS Enterprise Guide, version 7.1 (SAS Institute, Cary, NC).  
13  
14

15  
16 As a sensitivity analysis, we divided the not-early group—i.e. unexposed group—into  
17 late palliative care (i.e., only received palliative care in the last six months of life) and never  
18 received palliative care. We conducted a sensitivity analysis to examine early vs. late and early  
19 vs. never subgroups separately in an attempt to control for unmeasured patient preferences.  
20 The hypotheses were that some patients may refuse palliative care altogether (which would  
21 appear in our data as never receiving any palliative care services even near death); and other  
22 patients might have been willing to receive palliative care but were offered it late (which would  
23 appear in our data as receiving it in the final six months of life). Analyzing the late users to the  
24 early users specifically, was an attempt to separate out those patients who might have refused  
25 palliative care as per their preference. The study was approved by the Hamilton Integrated  
26 Research Ethics Board (#3039). The study is reported using the Strengthening the Reporting of  
27 Observational Studies in Epidemiology (STROBE) framework for observational studies.<sup>36</sup>  
28  
29

### 30 **Patient and Public Involvement**

31 Patients and the public were not involved this research.  
32  
33

## 34 **RESULTS**

### 35 **Patients**

36 After excluding those with a cancer diagnosis within 6 months of death (n=84,673), our  
37 overall eligible cohort consisted of 144,306 cancer decedents in Ontario between 2004 and  
38  
39  
40  
41  
42  
43

1  
2  
3 2014, of which 53,959 (37.4%) received early palliative care 12 to six months before death.  
4  
5 Eighty-nine percent (n=128,248) of the overall cohort did not have a RAI-HC in the exposure  
6  
7 period (No-RAI) and they were matched separately than the 11% (n=16,058) who did have the  
8  
9 assessment (Yes-RAI). (Figure 1) Baseline characteristics before propensity score matching are  
10  
11 shown in Appendix S1, and those after propensity score matching are shown in Table 1.

12  
13 In the No-RAI group, we matched 82.6% of patients who received early palliative care  
14  
15 for a total of 36,238 matched pairs. After matching, the decedent covariate distributions were  
16  
17 nearly identical between the two groups. For instance, average age was 69, 23.5% had lung  
18  
19 cancer and 14.2% had stage IV disease. In the No-RAI group, during the exposure period the  
20  
21 group received 53,787 palliative care services, of which approximately 40% of services were  
22  
23 homecare and 40% were outpatient physician billings. The first initiation of early palliative care  
24  
25 was about 300 days before death. In the last 6 months of life, the early group received 91,321  
26  
27 palliative care services (30% home care, 33% physician consults and 24% hospital), whereas the  
28  
29 late group received 63,994 palliative care services (25% home care, 35% physician consults and  
30  
31 29% hospital admissions).

32  
33 In the Yes-RAI group, we matched 59.9% of patients who received regular homecare in  
34  
35 the exposure period to those who received palliative homecare services in the exposure period  
36  
37 for a total of 3,586 matched pairs. After matching, the decedent covariate distributions were  
38  
39 nearly identical between the two groups. For instance, 11.8% had moderate to severe health  
40  
41 instability using the CHES score, 6.8% were fully dependent on their ADLs, and 11.0% had  
42  
43 moderate-severe pain. In the Yes-RAI group, during the exposure period the group received  
44  
45 5,468 palliative care services, of which nearly half were homecare services. The first initiation of  
46  
47 early palliative care was about 330 days before death. In the last 6 months of life, the early  
48  
49 group received 8,484 palliative care services (same distributions as No-RAI group) whereas the  
50  
51 late group received 4,664 palliative care services (16% home care, 38% physician consults and  
52  
53 37% hospital admissions).

### 54 **Aggressive Care**

55  
56 Among matched pairs in the No-RAI group, those who received early palliative care had  
57  
58 lower risk difference of the aggressive care outcomes compared to the not-early group. (Table  
59  
60

1  
2  
3 2) 38.1% of the early palliative care decedents died in hospital, compared to 48.1% of the non-  
4 early palliative care group, resulting in a lower absolute risk difference of 10.0%. Similarly, the  
5 aggregate measure of aggressive care was lower by 10.4% among early palliative care  
6 decedents. The early palliative care decedents have a lower absolute risk difference of an  
7 Emergency Department visit (9.7%), hospital admission (10.1%), and ICU admission (4.4%) in  
8 the last month of life compared to the not-early group.  
9  
10  
11  
12  
13

14 Among matched pairs in the Yes-RAI groups, we found similar results in the direction  
15 and magnitude of the absolute risk differences favoring early palliative care. Note, McNemar's  
16 tests for matched pairs were significant ( $p < 0.0001$  for all measures). Further, the sensitivity  
17 analyses in the Yes-RAI and No-RAI groups separately, looking at matched pairs of early vs. late  
18 palliative care and early vs. never palliative care respectively, showed that the early palliative  
19 care group consistently had lower absolute risk differences for all outcomes, in similar  
20 magnitudes. (Appendix S2)  
21  
22  
23  
24  
25  
26

### 27 **Supportive Home Care**

28  
29 Among the matched pairs in the No-RAI group, those who received early palliative care  
30 had higher risk of receiving supportive home care outcomes compared to the not-early group.  
31 (Table 3) The aggregate measure of supportive home care was higher by 23% among early  
32 palliative care decedents vs. not-early decedents. 56.2% of the early palliative care decedents  
33 had any end-of-life home care nursing in the last 30 days, compared to 34.0% of the non-early  
34 palliative care group, resulting in a lower absolute risk difference of 22.2%. The early palliative  
35 care decedents have a higher absolute risk of having a physician house call (10.2%) and an end-  
36 of-life personal support worker in the last month of life (16.0%) vs. not-early decedents.  
37  
38  
39  
40  
41  
42

43 Among the matched pairs in the Yes-RAI groups, we found similar trends in direction,  
44 but at larger magnitudes: a 37.8% higher absolute risk difference of having any one of the three  
45 supportive home care outcomes. Note, McNemar's tests for matched pairs were significant ( $p$   
46  $< 0.0001$  for all measures). Further the sensitivity analyses, examining early vs. late and early vs.  
47 never palliative care matched pairs separately, showed that early palliative care consistently  
48 had higher absolute risk differences for all outcomes. (Appendix S3)  
49  
50  
51  
52  
53  
54  
55  
56  
57  
58  
59  
60

## DISCUSSION

In our population-based cohort of 114,306 cancer decedents, a propensity score matched cohort of those who received palliative care earlier than six months before death compared to those who did not had a: lower absolute risk of dying in hospital by 10-13%, lower absolute risk of an aggressive care outcome in the last month of life by 10%, and higher absolute risk of having a supportive care outcome in the last month of life by 23-38%. While prior randomized trials provided high internal validity within controlled settings, our approach provides high external validity in real-world settings. Bolstering the credibility that early palliative care is beneficial is the consistency of our findings across 2004-2014, which predate the publication of seminal randomized trials;<sup>1-3</sup> and the use of a population-based cancer cohort, meaning the findings were not a result of a particular cancer centre, intervention program, or cancer type.

This study addressed some of the noted gaps in prior research: it uses consistent exposure and outcome definitions over a long period of time and uses a large population-based cohort of all cancer types. Moreover, by using data from the RAI-HC, our study was able to control for previously unmeasured confounders known to be associated with receipt of early palliative care, such as worse pain, ADL dependency, depression, cognitive decline, and health instability. This seeks to address selection bias in prior observational studies where those receiving palliative care might be different (e.g. worse symptoms or have worse health instability) than those who do not. Our results were consistent with and without matching for RAI-HC variables. Moreover in our sensitivity analysis, where we examined early vs. late subgroup separately (where the assumption was that both groups of patients were amendable to receiving palliative care), the findings were consistent with our overall study results, further supporting the benefits of early palliative care.

The results of this study support policies to enable earlier access to end-of-life homecare services and outpatient physician services for palliative care. In particular, policies that prohibit the access of palliative care services unless one forgoes curative treatments or is certified as expected to die within 6 months or less are disincentives to earlier and concurrent access to palliative care. For instance in the United States, the Medicare Hospice Benefit

1  
2  
3 provides access to community-based hospice care but requires a physician to certify a life  
4 expectancy of less than six months and a patient commitment to forgo curative treatment.<sup>37</sup>  
5  
6 Besides policies, education is critical because research shows that patient preferences  
7 sometimes change over time,<sup>38</sup> and that clinicians play an important role in introducing and  
8 initiating palliative care (e.g. Serious Illness Conversations) and helping patients make informed  
9 treatment decisions about goals of care for end of life.<sup>39</sup>  
10  
11  
12  
13

14 Our study has limitations. The propensity score matched design means we are  
15 comparing amongst those who are likely to have received early palliative care, but this may not  
16 represent the entire population of cancer decedents. We did not directly measure patient,  
17 family or provider preferences, which would be useful to control for in future studies. We used  
18 administrative data and billing codes to determine access to palliative care, which does not  
19 always represent the true intent of care provided, and we did not include billings from long-  
20 term care settings. As well, future research should examine outcomes of health system costs,  
21 health resource utilization, or patient and caregiver well-being.  
22  
23  
24  
25  
26  
27  
28

29 In conclusion, across an 11-year population-based, cancer cohort, those who received  
30 early palliative care (before six months of death) compared to a matched cohort of those who  
31 did not, were more likely to receive supportive home care and less likely to receive hospital  
32 care in the last month of life. Our findings suggest that policies and education strategies to  
33 support the delivery of early palliative care might reduce the risk of dying in hospital and  
34 receiving aggressive care at end-of-life in real-world settings.  
35  
36  
37  
38  
39  
40  
41  
42  
43  
44  
45  
46  
47  
48  
49  
50  
51  
52  
53  
54  
55  
56  
57  
58  
59  
60



**Table 1. Demographics of Early vs. Not-Early Palliative Care**

|                                                              | After propensity score matching        |                                    |      |                                       |                                   |      |
|--------------------------------------------------------------|----------------------------------------|------------------------------------|------|---------------------------------------|-----------------------------------|------|
|                                                              | No-RAI                                 |                                    |      | Yes-RAI                               |                                   |      |
|                                                              | Not Early Palliative Care (N = 36,238) | Early Palliative Care (N = 36,238) | SD   | Not Early Palliative Care (N = 3,586) | Early Palliative Care (N = 3,568) | SD   |
| <b>Variables that were Hard Matched</b>                      | <b>N (%)</b>                           | <b>N (%)</b>                       |      | <b>N (%)</b>                          | <b>N (%)</b>                      |      |
| Mean age ± Standard Deviation                                | 69.43 ± 12.84                          | 69.36 ± 12.87                      | 0.01 | 76.63 ± 11.25                         | 76.46 ± 11.19                     | 0.01 |
| Female                                                       | 17,702 (48.8)                          | 17,702 (48.8)                      | 0.00 | 1,826 (50.9)                          | 1,826 (50.9)                      | 0.00 |
| Cancer Type at Diagnosis                                     |                                        |                                    |      |                                       |                                   |      |
| Breast                                                       | 4,126 (11.4)                           | 4,126 (11.4)                       | 0.00 | 433 (12.1)                            | 433 (12.1)                        | 0.00 |
| Colorectal                                                   | 5,266 (14.5)                           | 5,266 (14.5)                       | 0.00 | 722 (20.1)                            | 722 (20.1)                        | 0.00 |
| Hematology                                                   | 2,982 (8.2)                            | 2,982 (8.2)                        | 0.00 | 479 (13.4)                            | 479 (13.4)                        | 0.00 |
| Lung                                                         | 8,530 (23.5)                           | 8,530 (23.5)                       | 0.00 | 548 (15.3)                            | 548 (15.3)                        | 0.00 |
| Prostate                                                     | 3,053 (8.4)                            | 3,053 (8.4)                        | 0.00 | 486 (13.6)                            | 486 (13.6)                        | 0.00 |
| Stage at Diagnosis                                           |                                        |                                    |      |                                       |                                   |      |
| Stage III                                                    | 3,726 (10.3)                           | 3,726 (10.3)                       | 0.00 | 275 (7.7)                             | 275 (7.7)                         | 0.00 |
| Stage IV                                                     | 5,151 (14.2)                           | 5,151 (14.2)                       | 0.00 | 329 (9.2)                             | 329 (9.2)                         | 0.00 |
| Unavailable                                                  | 24,631 (68.0)                          | 24,631 (68.0)                      | 0.00 | 2,749 (76.7)                          | 2,749 (76.7)                      | 0.00 |
| CHESS Score (when RAI-HC completed)                          |                                        |                                    |      |                                       |                                   |      |
| No health instability                                        | -                                      | -                                  | -    | 921 (25.7)                            | 921 (25.7)                        | 0.00 |
| Low health instability                                       | -                                      | -                                  | -    | 2,242 (62.5)                          | 2,242 (62.5)                      | 0.00 |
| Moderate health instability                                  | -                                      | -                                  | -    | 380 (10.6)                            | 380 (10.6)                        | 0.00 |
| Severe health instability                                    | -                                      | -                                  | -    | 43 (1.2)                              | 43 (1.2)                          | 0.00 |
| <b>Variables within the Propensity Score</b>                 |                                        |                                    |      |                                       |                                   |      |
| Lowest income quintile                                       | 7,058 (19.5)                           | 7,146 (19.7)                       | 0.01 | 776 (21.6)                            | 790 (22.0)                        | 0.01 |
| Highest income quintile                                      | 7,102 (19.6)                           | 7,130 (19.7)                       | 0.00 | 626 (17.5)                            | 622 (17.3)                        | 0.00 |
| Lives in Rural Community                                     | 5,206 (14.4)                           | 5,236 (14.4)                       | 0.00 | 579 (16.1)                            | 568 (15.8)                        | 0.01 |
| Deyo-Charlson Comorbidity Score (>=1)                        | 12,026 (33.2)                          | 12,540 (34.6)                      | 0.03 | 1,483 (41.4)                          | 1,426 (39.8)                      | 0.08 |
| Had Radiation since diagnosis                                | 22,337 (61.6)                          | 21,982 (60.7)                      | 0.02 | 1,894 (52.8)                          | 1,950 (54.4)                      | 0.03 |
| Had Cancer Surgery since diagnosis                           | 16,339 (45.1)                          | 15,701 (43.3)                      | 0.04 | 1,780 (49.6)                          | 1,716 (47.9)                      | 0.04 |
| Mean hospital days (between 2 and 1 years before death) ± SD | 0.82 ± 1.12                            | 0.84 ± 1.17                        | 0.01 | 0.94 ± 1.21                           | 0.91 ± 1.16                       | 0.03 |
| Disease duration                                             |                                        |                                    |      |                                       |                                   |      |
| 0-5 years                                                    | 28,084 (77.5)                          | 29,115 (80.3)                      | 0.07 | 2,347 (65.4)                          | 2,515 (70.1)                      | 0.10 |
| 6-11 years                                                   | 4,918 (13.6)                           | 4,581 (12.6)                       | 0.03 | 656 (18.3)                            | 636 (17.7)                        | 0.01 |
| 12-17 years                                                  | 2,018 (5.6)                            | 1,618 (4.5)                        | 0.05 | 324 (9.0)                             | 249 (6.9)                         | 0.08 |
| 18+ years                                                    | 1,218 (3.4)                            | 924 (2.5)                          | 0.05 | 259 (7.2)                             | 186 (5.2)                         | 0.08 |
| <b>InterRAI Scales (When RAI-HC completed)</b>               |                                        |                                    |      |                                       |                                   |      |
| Dependent on Activities of Daily Living                      | -                                      | -                                  | -    | 241 (6.7)                             | 247 (6.9)                         | 0.01 |
| Minor-major depression                                       | -                                      | -                                  | -    | 496 (13.8)                            | 429 (10.0)                        | 0.06 |
| Moderate-severe cognitive impairment                         | -                                      | -                                  | -    | 373 (10.4)                            | 363 (10.1)                        | 0.01 |
| Moderate-severe pain                                         | -                                      | -                                  | -    | 391 (10.9)                            | 398 (11.1)                        | 0.01 |
| Caregiver Present at Home                                    | -                                      | -                                  | -    | 2,279 (63.6)                          | 2,264 (63.1)                      | 0.01 |

**Table 2: Aggressive care measures in decedents with or without a RAI assessment**

|                                                                 | NO-RAI                                  |                                             |                                                       |      | YES-RAI                                |                                            |                                                       |      |
|-----------------------------------------------------------------|-----------------------------------------|---------------------------------------------|-------------------------------------------------------|------|----------------------------------------|--------------------------------------------|-------------------------------------------------------|------|
|                                                                 | Early Palliative Care<br>N = 36,238 (%) | Not Early Palliative Care<br>N = 36,238 (%) | Absolute Risk Difference (%)<br>(Early vs. Not Early) | SD   | Early Palliative Care<br>N = 3,586 (%) | Not Early Palliative Care<br>N = 3,586 (%) | Absolute Risk Difference (%)<br>(Early vs. Not Early) | SD   |
| Death in acute care hospital                                    | 13,823 (38.1)                           | 17,434 (48.1)                               | -10.0                                                 | 0.21 | 1,278 (35.6)                           | 1,751 (48.8)                               | -13.2                                                 | 0.21 |
| Aggressive care (any one or combination of the following three) | 18,822 (51.9)                           | 22,586 (62.3)                               | -10.4                                                 | 0.21 | 1,718 (47.9)                           | 2,089 (58.3)                               | -10.4                                                 | 0.21 |
| At least 1 ED visits within last 30 days                        | 15,550 (42.9)                           | 19,075 (52.6)                               | -9.7                                                  | 0.21 | 1,454 (40.5)                           | 1,827 (50.9)                               | -10.4                                                 | 0.21 |
| Any hospital admission within last 30 days                      | 16,286 (44.9)                           | 19,918 (55.0)                               | -10.1                                                 | 0.25 | 1,492 (41.6)                           | 1863 (52.0)                                | -10.4                                                 | 0.25 |
| Any ICU admission within last 30 days                           | 1,299 (3.6)                             | 2,889 (8.0)                                 | -4.4                                                  | 0.85 | 83 (2.3)                               | 274 (7.6)                                  | -5.3                                                  | 0.85 |

\*McNemar's test was significant to <0.0001 for all measures

**Table 3: Supportive home care measures in decedents with or without a RAI assessment**

|                                                                      | NO-RAI                                  |                                             |                                                       |      | YES-RAI                                |                                            |                                                       |      |
|----------------------------------------------------------------------|-----------------------------------------|---------------------------------------------|-------------------------------------------------------|------|----------------------------------------|--------------------------------------------|-------------------------------------------------------|------|
|                                                                      | Early Palliative Care<br>N = 36,238 (%) | Not Early Palliative Care<br>N = 36,238 (%) | Absolute Risk Difference (%)<br>(Early vs. Not Early) | SD   | Early Palliative Care<br>N = 3,586 (%) | Not Early Palliative Care<br>N = 3,586 (%) | Absolute Risk Difference (%)<br>(Early vs. Not Early) | SD   |
| Supportive home care (any one or combination of the following three) | 22,191 (61.2)                           | 13,736 (37.9)                               | 23.3                                                  | 0.39 | 2,012 (56.1)                           | 656 (18.3)                                 | 37.8                                                  | 0.39 |
| Physician house call in last 30 days                                 | 9,754 (26.9)                            | 6,061 (16.7)                                | 10.2                                                  | 0.86 | 859 (24.0)                             | 341 (9.5)                                  | 14.5                                                  | 0.86 |
| Palliative homecare nursing at home in last 30 days                  | 20,370 (56.2)                           | 12320 (34.0)                                | 22.2                                                  | 0.73 | 1,822 (50.8)                           | 494 (13.8)                                 | 37.0                                                  | 0.73 |
| Palliative personal support at home in last 30 days                  | 13,728 (37.9)                           | 7,954 (21.9)                                | 16.0                                                  | 0.27 | 1,449 (40.4)                           | 374 (10.4)                                 | 30.0                                                  | 0.27 |

\*McNemar's test was significant to <0.0001 for all measures

[Title for Figures:]

Figure 1. CONSORT Diagram

1  
2  
3 **Contributors:** HS, LB and RS conceived the hypothesis, acquired the data, and designed the analysis  
4 plan. UEO performed the analyses. HS wrote the manuscript. All authors (HS, LB, RS, FB, KM, DG, BL, KC,  
5 SP, UEO) authors interpreted the data, critically revised the manuscript for important intellectual  
6 content, and approved the final manuscript. HS, UEO and RS had full access to all of the data in the study  
7 and can take responsibility for the integrity of the data and the accuracy of the data analysis. The  
8 corresponding author attests that all listed authors meet authorship criteria and that no others meeting  
9 the criteria have been omitted.  
10

11  
12 **Competing Interests Declaration:** All authors have completed the ICMJE uniform disclosure form at  
13 [www.icmje.org/coi\\_disclosure.pdf](http://www.icmje.org/coi_disclosure.pdf) and declare: no support from any organisation for the submitted  
14 work; no financial relationships with any organisations that might have an interest in the submitted  
15 work in the previous three years; no other relationships or activities that could appear to have  
16 influenced the submitted work.  
17

18  
19 **Funding Statement and Declaration:** This work is funded by the Canadian Centre for Applied Research in  
20 Cancer Control (ARCC). ARCC receives core funding from the Canadian Cancer Society Research Institute  
21 (grant #2015-703549). The lead author is also supported by the Canada Research Chairs program. The  
22 study used databases maintained by the Institute for Clinical Evaluative Sciences, which receives funding  
23 from the Ontario Ministry of Health and Long Term Care. The opinions, results, and conclusions reported  
24 in this paper are those of the authors and are independent from the funding and data providing sources.  
25

26  
27 **Data Sharing statement:** Data may be obtained from a third party and are not publicly available. A data  
28 request can be sent to ICES (formerly the Institute for Clinical Evaluative Sciences):  
29 <https://www.ices.on.ca/About-ICES/ICES-Contacts-and-Locations/contact-form>  
30

**REFERENCES**

1. Zimmermann C, Swami N, Krzyzanowska M, et al: Early palliative care for patients with advanced cancer: a cluster-randomised controlled trial. *Lancet* 383:1721-1730, 2014
2. Temel JS, Greer JA, Muzikansky A, et al: Early palliative care for patients with metastatic non-small-cell lung cancer. *N Engl J Med* 363:733-742, 2010
3. Bakitas M, Lyons KD, Hegel MT, et al: Effects of a palliative care intervention on clinical outcomes in patients with advanced cancer: the Project ENABLE II randomized controlled trial. *JAMA* 302:741-749, 2009
4. Ferrell BR, Temel JS, Temin S, et al: Integration of Palliative Care Into Standard Oncology Care: ASCO Clinical Practice Guideline Update Summary. *J Oncol Pract* 13:119-121, 2017
5. Smith TJ, Temin S, Alesi ER, et al: American Society of Clinical Oncology provisional clinical opinion: the integration of palliative care into standard oncology care. *J. Clin. Oncol* 30:880-887, 2012
6. Centers for Medicare & Medicaid Services. Medicare hospice benefits. Baltimore, 2013
7. Qureshi D, Tanuseputro P, Perez R, et al: Early initiation of palliative care is associated with reduced late-life acute-hospital use: A population-based retrospective cohort study. *Palliat Med*:269216318815794, 2018
8. McNamara BA, Rosenwax LK, Murray K, et al: Early admission to community-based palliative care reduces use of emergency departments in the ninety days before death. *J. Palliat. Med* 16:774-779, 2013
9. Pellizzari M, Hui D, Pinato E, et al: Impact of intensity and timing of integrated home palliative cancer care on end-of-life hospitalization in Northern Italy. *Support Care Cancer* 25:1201-1207, 2017
10. Wright CM, Youens D, Moorin RE: Earlier Initiation of Community-Based Palliative Care Is Associated With Fewer Unplanned Hospitalizations and Emergency Department Presentations in the Final Months of Life: A Population-Based Study Among Cancer Decedents. *J Pain Symptom Manage* 55:745-754.e8, 2018
11. Seow H, Barbera L, Howell D, et al: Using more end-of-life homecare services is associated with using fewer acute care services: a population-based cohort study. *MED. CARE* 48:118-124, 2010
12. Spilsbury K, Rosenwax L, Arendts G, et al: The impact of community-based palliative care on acute hospital use in the last year of life is modified by time to death, age and underlying cause of death. A population-based retrospective cohort study. *PLoS One* 12:e0185275, 2017
13. Davis MP, Temel JS, Balboni T, et al: A review of the trials which examine early integration of outpatient and home palliative care for patients with serious illnesses. *Ann Palliat Med* 4:99-121, 2015
14. Brazil K, Bainbridge D, Sussman J, et al: Coordination of palliative cancer care in the community: "unfinished business". *Support. Care Cancer* 17:819-828, 2009
15. Corner J, Halliday D, Haviland J, et al: Exploring nursing outcomes for patients with advanced cancer following intervention by Macmillan specialist palliative care nurses. *J Adv Nurs* 41:561-74, 2003
16. Seow H, Brazil K, Sussman J, et al: Impact of community based, specialist palliative care teams on hospitalisations and emergency department visits late in life and hospital deaths: a pooled analysis. *BMJ* 348:g3496, 2014
17. Tanuseputro P, Budhwani S, Bai YQ, et al: Palliative care delivery across health sectors: A population-level observational study. *PALLIAT. MED*, 2016

18. National Hospice and Palliative Care Organization. NHPCO facts and figures: Hospice care in America. Alexandria, Virginia, 2016
19. Romo RD, Lynn J: The utility and value of the "surprise question" for patients with serious illness. *CMAJ* 189:E1072-E1073, 2017
20. Earle CC, Park ER, Lai B, et al: Identifying potential indicators of the quality of end-of-life cancer care from administrative data. *J Clin Oncol* 21, 2003
21. Warren JL, Barbera L, Bremner KE, et al: End-of-life care for lung cancer patients in the United States and Ontario. *J. Natl. Cancer Inst* 103:853-862, 2011
22. Rosenbaum P, Rubin D: The central role of the propensity score in observational studies for causal effects. *Biometrika* 70:41-55, 1983
23. Rosenbaum P, Rubin D: Constructing a control group using multivariate matched sampling methods that incorporate the propensity score. *The American Statistician* 39:33-38, 1985
24. Austin PC: Balance diagnostics for comparing the distribution of baseline covariates between treatment groups in propensity-score matched samples. *Stat. Med* 28:3083-3107, 2009
25. Austin PC: Type I Error Rates, Coverage of Confidence Intervals, and Variance Estimation in Propensity-Score Matched Analyses. *The International Journal of Biostatistics* 5, 2009
26. Henson LA, Gomes B, Koffman J, et al: Factors associated with aggressive end of life cancer care. *Support Care Cancer* 24:1079-89, 2016
27. Hirdes JP, Ljunggren G, Morris JN, et al: Reliability of the interRAI suite of assessment instruments: a 12-country study of an integrated health information system. *BioMed Central Health Services Research* 8:1-11, 2008
28. Hirdes JP, Poss JW, Mitchell L, et al: Use of the interRAI CHES scale to predict mortality among persons with neurological conditions in three care settings. *PLoS One* 9:e99066, 2014
29. Hirdes JP, Frijters DH, Teare GF: The MDS-CHES scale: a new measure to predict mortality in institutionalized older people. *J Am Geriatr Soc* 51:96-100, 2003
30. Morris JN, Fries BE, Morris SA: Scaling ADLs within the MDS. *J Gerontol A Biol Sci Med Sci* 54A:M546-M553, 1999
31. Burrows AB, Morris JN, Simon SE, et al: Development of an MDS-based depression rating scale for use in nursing homes. *Age Ageing* 29:165-172, 2000
32. Morris JN, Fries BE, Mehr DR, et al: MDS Cognitive Performance Scale. *J Gerontol A Biol Sc Med Sci* 49:M174-M182, 1994
33. Fries BE, Simon SE, Morris JN, et al: Pain in U.S. nursing homes: validating a pain scale for the minimum data set. *Gerontologist* 41:173-9, 2001
34. Austin PC: Primer on statistical interpretation or methods report card on propensity-score matching in the cardiology literature from 2004 to 2006: a systematic review. *Circ Cardiovasc Qual Outcomes* 1:62-7, 2008
35. Austin PC: A critical appraisal of propensity-score matching in the medical literature between 1996 and 2003. *Stat. Med* 27:2037-2049, 2008
36. von Elm E, Altman DG, Egger M, et al: The Strengthening the Reporting of Observational Studies in Epidemiology (STROBE) Statement: guidelines for reporting observational studies. *Int J Surg* 12:1495-9, 2014
37. Carlson MD, Morrison RS, Bradley EH: Improving access to hospice care: informing the debate. *J Palliat Med* 11:438-43, 2008
38. Gomes B, Calanzani N, Gysels M, et al: Heterogeneity and changes in preferences for dying at home: a systematic review. *BMC. Palliat. Care* 12:7, 2013
39. Paladino J, Bernacki R, Neville BA, et al: Evaluating an Intervention to Improve Communication Between Oncology Clinicians and Patients With Life-Limiting Cancer: A Cluster Randomized Clinical Trial of the Serious Illness Care Program. *JAMA Oncol*, 2019

1  
2  
3  
4  
5  
6  
7  
8  
9  
10  
11  
12  
13  
14  
15  
16  
17  
18  
19  
20  
21  
22  
23  
24  
25  
26  
27  
28  
29  
30  
31  
32  
33  
34  
35  
36  
37  
38  
39  
40  
41  
42  
43  
44  
45  
46  
47  
48  
49  
50  
51  
52  
53  
54  
55  
56  
57  
58  
59  
60

For peer review only

Figure 1. Consort Diagram

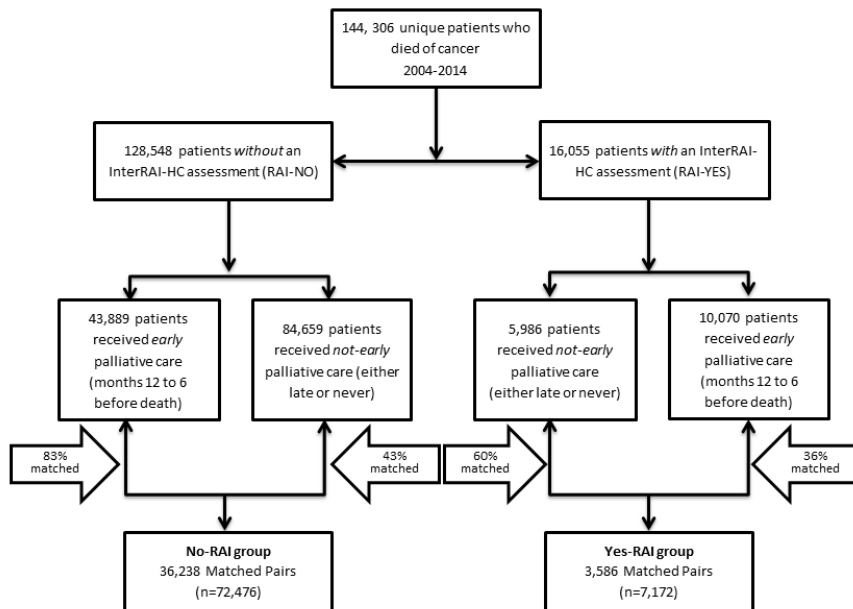

254x190mm (96 x 96 DPI)



## Appendix S1. Demographics of Early vs. Not-Early before Propensity Score Matching

|                                                | Before Propensity Score matching          |                                       |      |
|------------------------------------------------|-------------------------------------------|---------------------------------------|------|
|                                                | Not Early Palliative Care<br>(N = 90,347) | Early Palliative Care<br>(N = 53,959) | SD   |
| <b>Variables that were Hard Matched</b>        | <b>N (%)</b>                              | <b>N (%)</b>                          |      |
| Mean Age ± Standard Deviation (SD)             | 72 ± 13                                   | 69 ± 14                               | 0.21 |
| Female                                         | 41,994 (46.5)                             | 27,113 (50.2)                         | 0.59 |
| Cancer Type at Diagnosis                       |                                           |                                       |      |
| Breast                                         | 10,539 (11.7)                             | 5,850 (10.8)                          | 0.03 |
| Colorectal                                     | 12,051 (13.3)                             | 8,579 (15.9)                          | 0.07 |
| Hematology                                     | 10,546 (11.7)                             | 4,150 (7.7)                           | 0.13 |
| Lung                                           | 17,444 (19.3)                             | 13,050 (24.2)                         | 0.12 |
| Prostate                                       | 9,041 (10.0)                              | 4,384 (8.1)                           | 0.07 |
| Stage at Diagnosis                             |                                           |                                       |      |
| Stage III                                      | 6,222 (6.9)                               | 5,858 (10.9)                          | 0.14 |
| Stage IV                                       | 7,347 (8.1)                               | 10,832 (20.1)                         | 0.35 |
| Unavailable                                    | 70,351 (77.9)                             | 32,731 (60.7)                         | 0.38 |
| CHESS Score (when RAI-HC completed)            |                                           |                                       |      |
| No health instability                          | 1,704 (1.9)                               | 2,221 (4.1)                           | 0.13 |
| Low health instability                         | 3,433 (3.8)                               | 5,458 (10.1)                          | 0.25 |
| Moderate health instability                    | 714 (0.8)                                 | 1,761 (3.3)                           | 0.18 |
| Severe health instability                      | 135 (0.1)                                 | 629 (1.2)                             | 0.13 |
| <b>InterRAI Scales (When RAI-HC completed)</b> |                                           |                                       |      |
| Dependent on Activities of Daily Living        | 433 (0.5)                                 | 684 (1.3)                             | 0.08 |
| Minor-major depression                         | 809 (0.9)                                 | 1,797 (3.3)                           | 0.17 |
| Moderate-severe cognitive impairment           | 869 (1.0)                                 | 764 (1.4)                             | 0.04 |
| Moderate-severe pain                           | 606 (0.7)                                 | 1,457 (2.7)                           | 0.16 |
| Caregiver Present at Home                      | 3528 (3.9)                                | 6,970 (12.9)                          | 0.33 |
| <b>Variables within the Propensity Score</b>   |                                           |                                       |      |
| Lowest income quintile                         | 18,686 (20.7)                             | 10,682 (19.8)                         | 0.02 |
| Highest income quintile                        | 17,154 (19.0)                             | 10,492 (19.4)                         | 0.01 |
| Lives in Rural Community                       | 13,597 (15.0)                             | 7,813 (14.5)                          | 0.02 |
| Deyo-Charlson Comorbidity Score (>=1)          | 13,728 (15.2)                             | 9,553 (17.7)                          | 0.10 |
| Had Radiation since diagnosis                  | 43,298 (47.9)                             | 34,226 (63.4)                         | 0.32 |

|                                                                                      |                 |                 |      |
|--------------------------------------------------------------------------------------|-----------------|-----------------|------|
| Had Cancer Surgery since diagnosis                                                   | 37,369 (41.4)   | 23,917 (44.3)   | 0.59 |
| Prior hospital utilization (Mean no. of visits in year 2 to 1 before death $\pm$ SD) | 0.71 $\pm$ 1.09 | 0.96 $\pm$ 1.23 | 0.22 |
| Disease Duration (Diagnosis to death)                                                |                 |                 |      |
| 0-5 years                                                                            | 66,375 (73.5)   | 43,930 (81.4)   | 0.19 |
| 6-11 years                                                                           | 13,907 (15.4)   | 6,467 (12.0)    | 0.10 |
| 12-17 years                                                                          | 5,848 (6.5)     | 2,249 (4.2)     | 0.10 |
| 18+ years                                                                            | 4,217 (4.7)     | 1,313 (2.4)     | 0.12 |
| Health Region                                                                        |                 |                 |      |
| 1                                                                                    | 5,302 (5.9)     | 3,144 (5.8)     | 0.00 |
| 2                                                                                    | 7,628 (8.4)     | 4,408 (8.2)     | 0.01 |
| 3                                                                                    | 4,235 (4.7)     | 3,277 (6.1)     | 0.06 |
| 4                                                                                    | 12,721 (14.1)   | 6,028 (11.2)    | 0.09 |
| 5                                                                                    | 3,220 (3.6)     | 2,413 (4.5)     | 0.05 |
| 6                                                                                    | 6,148 (6.8)     | 3,488 (6.5)     | 0.01 |
| 7                                                                                    | 7,621 (8.4)     | 4,254 (7.9)     | 0.02 |
| 8                                                                                    | 9,094 (10.1)    | 5,355 (9.9)     | 0.00 |
| 9                                                                                    | 10,227 (11.3)   | 6,153 (11.4)    | 0.00 |
| 10                                                                                   | 4,911 (5.4)     | 2,744 (5.1)     | 0.02 |
| 11                                                                                   | 7,808 (8.6)     | 6,117 (11.3)    | 0.09 |
| 12                                                                                   | 3,531 (3.9)     | 2,424 (4.5)     | 0.03 |
| 13                                                                                   | 5,795 (6.4)     | 3,079 (5.7)     | 0.03 |
| 14                                                                                   | 2,025 (2.2)     | 1,040 (1.9)     | 0.02 |

## Appendix S2. Aggressive Care Measures comparing Early vs. Late and Early vs. Never

|                                                                 | RAI NO                                  |                                        |                                                                 |      | RAI YES                                |                                       |                                                                 |      |
|-----------------------------------------------------------------|-----------------------------------------|----------------------------------------|-----------------------------------------------------------------|------|----------------------------------------|---------------------------------------|-----------------------------------------------------------------|------|
|                                                                 | Early Palliative Care<br>N = 28,285 (%) | Late Palliative Care<br>N = 28,285 (%) | Absolute Risk Difference (%)<br>(Early vs Late Palliative Care) | SD   | Early Palliative Care<br>N = 2,323 (%) | Late Palliative Care<br>N = 2,323 (%) | Absolute Risk Difference (%)<br>(Early vs Late Palliative Care) | SD   |
| <b>Late PC vs. Early PC</b>                                     |                                         |                                        |                                                                 |      |                                        |                                       |                                                                 |      |
| Death in acute care hospital                                    | 10,788 (38.1)                           | 13,109 (46.3)                          | -8.2                                                            | 0.17 | 831 (35.8)                             | 1,152 (49.6)                          | -13.8                                                           | 0.28 |
| Aggressive care (any one or combination of the following three) | 14,763 (52.2)                           | 17,379 (61.4)                          | -9.2                                                            | 0.19 | 1,135 (48.9)                           | 1,344 (57.9)                          | -9.0                                                            | 0.18 |
| At least 1 ED visits within last 30 days                        | 12,232 (43.2)                           | 14,552 (51.4)                          | -8.2                                                            | 0.16 | 949 (40.9)                             | 1,141 (49.1)                          | -8.2                                                            | 0.17 |
| Any hospital admission within last 30 days                      | 12,750 (45.1)                           | 15,492 (54.8)                          | -9.7                                                            | 0.19 | 992 (42.7)                             | 1,223 (52.6)                          | -9.9                                                            | 0.20 |
| Any ICU admission within last 30 days                           | 1,022 (3.6)                             | 1,379 (4.9)                            | -1.3                                                            | 0.06 | 53 (2.3)                               | 111 (4.8)                             | -2.5                                                            | 0.14 |
| <b>Never PC vs. Early PC</b>                                    |                                         |                                        |                                                                 |      |                                        |                                       |                                                                 |      |
| Death in acute care hospital                                    | 3,035 (38.2)                            | 4,325 (54.4)                           | -16.2                                                           | 0.33 | 447 (35.4)                             | 599 (47.4)                            | -12.0                                                           | 0.25 |
| Aggressive care (any one or combination of the following three) | 4,059 (51.0)                            | 5,207 (65.5)                           | -14.5                                                           | 0.30 | 583 (46.2)                             | 745 (59.0)                            | -12.8                                                           | 0.26 |
| At least 1 ED visits within last 30 days                        | 3,318 (41.7)                            | 4,523 (56.9)                           | -15.2                                                           | 0.31 | 505 (40.0)                             | 686 (54.3)                            | -14.3                                                           | 0.29 |
| Any hospital admission within last 30 days                      | 3,536 (44.5)                            | 4,426 (55.7)                           | -11.2                                                           | 0.23 | 500 (39.6)                             | 640 (50.7)                            | -11.1                                                           | 0.22 |
| Any ICU admission within last 30 days                           | 277 (3.5)                               | 1,510 (19.0)                           | -15.5                                                           | 0.51 | 30 (2.4)                               | 163 (12.9)                            | -10.5                                                           | 0.40 |

\*McNemar's test was significant to <0.0001 for all measures

**Appendix S3. Supportive Home Care Measures comparing Early vs. Late and Early vs. Never**

|                                                                      | RAI NO                |                       |                                                               |      | RAI YES               |                       |                                                               |      |
|----------------------------------------------------------------------|-----------------------|-----------------------|---------------------------------------------------------------|------|-----------------------|-----------------------|---------------------------------------------------------------|------|
|                                                                      | Early Palliative Care | Late Palliative Care  | Absolute Risk Difference (%) (Early vs Late Palliative Care)  | SD   | Early Palliative Care | Late Palliative Care  | Absolute Risk Difference (%) (Early vs Late Palliative Care)  | SD   |
| <b>Late PC vs. Early PC</b>                                          | N = 28,285 (%)        | N = 28,285 (%)        |                                                               |      | N = 2,323 (%)         | N = 2,323 (%)         |                                                               |      |
| Supportive home care (any one or combination of the following three) | 17,552 (62.1)         | 13,736 (48.6)         | 13.5                                                          | 0.27 | 1,340 (57.7)          | 656 (28.2)            | 29.5                                                          | 0.62 |
| Physician house call in last 30 days                                 | 7,833 (27.7)          | 6,061 (21.4)          | 6.3                                                           | 0.15 | 582 (25.1)            | 341 (14.7)            | 10.4                                                          | 0.26 |
| Palliative homecare nursing at home in last 30 days                  | 16,083 (56.9)         | 12,320 (43.6)         | 13.3                                                          | 0.27 | 1,213 (52.2)          | 494 (21.3)            | 30.9                                                          | 0.68 |
| Palliative personal support nursing at home in last 30 days          | 10,745 (38.0)         | 7,954 (28.1)          | 9.9                                                           | 0.21 | 955 (41.4)            | 374 (16.1)            | 25.3                                                          | 0.58 |
| <b>Never PC vs. Early PC</b>                                         | Early Palliative Care | Never Palliative Care | Absolute Risk Difference (%) (Early vs Never Palliative Care) | SD   | Early Palliative Care | Never Palliative Care | Absolute Risk Difference (%) (Early vs Never Palliative Care) | SD   |
|                                                                      | N = 7,953 (%)         | N = 7,953 (%)         |                                                               |      | N = 1,263 (%)         | N = 1,263 (%)         |                                                               |      |
| Supportive home care (any one or combination of the following three) | 4,639 (58.3)          | 0                     | -                                                             | -    | 672 (53.2)            | 0                     | -                                                             | -    |
| Physician house call in last 30 days                                 | 1,921 (24.2)          | 0                     | -                                                             | -    | 277 (21.9)            | 0                     | -                                                             | -    |
| Palliative homecare nursing at home in last 30 days                  | 4,287 (53.9)          | 0                     | -                                                             | -    | 609 (48.2)            | 0                     | -                                                             | -    |
| Palliative personal support nursing at home in last 30 days          | 2,983 (37.5)          | 0                     | -                                                             | -    | 494 (39.1)            | 0                     | -                                                             | -    |

\*McNemar's test was significant to <0.0001 for all measures

STROBE Statement—Checklist of items that should be included in reports of *cohort studies*

|                              | Item No | Recommendation                                                                                                                                                                                    | Page                       |
|------------------------------|---------|---------------------------------------------------------------------------------------------------------------------------------------------------------------------------------------------------|----------------------------|
| <b>Title and abstract</b>    | 1       | (a) Indicate the study's design with a commonly used term in the title or the abstract                                                                                                            | 1, 3                       |
|                              |         | (b) Provide in the abstract an informative and balanced summary of what was done and what was found                                                                                               | 3                          |
| <b>Introduction</b>          |         |                                                                                                                                                                                                   |                            |
| Background/rationale         | 2       | Explain the scientific background and rationale for the investigation being reported                                                                                                              | 5                          |
| Objectives                   | 3       | State specific objectives, including any prespecified hypotheses                                                                                                                                  | 5                          |
| <b>Methods</b>               |         |                                                                                                                                                                                                   |                            |
| Study design                 | 4       | Present key elements of study design early in the paper                                                                                                                                           | 6                          |
| Setting                      | 5       | Describe the setting, locations, and relevant dates, including periods of recruitment, exposure, follow-up, and data collection                                                                   | 5-6                        |
| Participants                 | 6       | (a) Give the eligibility criteria, and the sources and methods of selection of participants. Describe methods of follow-up                                                                        | 6-7                        |
|                              |         | (b) For matched studies, give matching criteria and number of exposed and unexposed                                                                                                               | 6-7                        |
| Variables                    | 7       | Clearly define all outcomes, exposures, predictors, potential confounders, and effect modifiers. Give diagnostic criteria, if applicable                                                          | 7-8                        |
| Data sources/<br>measurement | 8*      | For each variable of interest, give sources of data and details of methods of assessment (measurement). Describe comparability of assessment methods if there is more than one group              | 6-8                        |
| Bias                         | 9       | Describe any efforts to address potential sources of bias                                                                                                                                         | 8                          |
| Study size                   | 10      | Explain how the study size was arrived at                                                                                                                                                         | 6                          |
| Quantitative<br>variables    | 11      | Explain how quantitative variables were handled in the analyses. If applicable, describe which groupings were chosen and why                                                                      | 7-8                        |
| Statistical methods          | 12      | (a) Describe all statistical methods, including those used to control for confounding                                                                                                             | 7-8                        |
|                              |         | (b) Describe any methods used to examine subgroups and interactions                                                                                                                               | 7-8                        |
|                              |         | (c) Explain how missing data were addressed                                                                                                                                                       | NA                         |
|                              |         | (d) If applicable, explain how loss to follow-up was addressed                                                                                                                                    | NA                         |
|                              |         | (e) Describe any sensitivity analyses                                                                                                                                                             | 8                          |
| <b>Results</b>               |         |                                                                                                                                                                                                   |                            |
| Participants                 | 13*     | (a) Report numbers of individuals at each stage of study—eg numbers potentially eligible, examined for eligibility, confirmed eligible, included in the study, completing follow-up, and analysed | 9                          |
|                              |         | (b) Give reasons for non-participation at each stage                                                                                                                                              | NA                         |
|                              |         | (c) Consider use of a flow diagram                                                                                                                                                                | Fig 1                      |
| Descriptive data             | 14*     | (a) Give characteristics of study participants (eg demographic, clinical, social) and information on exposures and potential confounders                                                          | 9,<br>Table 1,<br>Table S1 |
|                              |         | (b) Indicate number of participants with missing data for each variable of interest                                                                                                               | NA                         |
|                              |         | (c) Summarise follow-up time (eg, average and total amount)                                                                                                                                       | Table 1                    |
| Outcome data                 | 15*     | Report numbers of outcome events or summary measures over time                                                                                                                                    | 9-10,<br>Table 2,          |

Table 3,  
Table S2  
Table S3

|    |                          |    |                                                                                                                                                                                                              |
|----|--------------------------|----|--------------------------------------------------------------------------------------------------------------------------------------------------------------------------------------------------------------|
| 1  |                          |    | Table 3,                                                                                                                                                                                                     |
| 2  |                          |    | Table S2                                                                                                                                                                                                     |
| 3  |                          |    | Table S3                                                                                                                                                                                                     |
| 4  |                          |    |                                                                                                                                                                                                              |
| 5  | Main results             | 16 | (a) Give unadjusted estimates and, if applicable, confounder-adjusted estimates and their precision (eg, 95% confidence interval). Make clear which confounders were adjusted for and why they were included |
| 6  |                          |    | NA                                                                                                                                                                                                           |
| 7  |                          |    |                                                                                                                                                                                                              |
| 8  |                          |    |                                                                                                                                                                                                              |
| 9  |                          |    |                                                                                                                                                                                                              |
| 10 |                          |    |                                                                                                                                                                                                              |
| 11 |                          |    |                                                                                                                                                                                                              |
| 12 |                          |    |                                                                                                                                                                                                              |
| 13 |                          |    |                                                                                                                                                                                                              |
| 14 | Other analyses           | 17 | Report other analyses done—eg analyses of subgroups and interactions, and sensitivity analyses                                                                                                               |
| 15 |                          |    | 10                                                                                                                                                                                                           |
| 16 |                          |    | Table S2                                                                                                                                                                                                     |
| 17 |                          |    | Table S3                                                                                                                                                                                                     |
| 18 | <b>Discussion</b>        |    |                                                                                                                                                                                                              |
| 19 | Key results              | 18 | Summarise key results with reference to study objectives                                                                                                                                                     |
| 20 |                          |    | 11                                                                                                                                                                                                           |
| 21 | Limitations              | 19 | Discuss limitations of the study, taking into account sources of potential bias or imprecision. Discuss both direction and magnitude of any potential bias                                                   |
| 22 |                          |    |                                                                                                                                                                                                              |
| 23 | Interpretation           | 20 | Give a cautious overall interpretation of results considering objectives, limitations, multiplicity of analyses, results from similar studies, and other relevant evidence                                   |
| 24 |                          |    | 11                                                                                                                                                                                                           |
| 25 |                          |    |                                                                                                                                                                                                              |
| 26 |                          |    |                                                                                                                                                                                                              |
| 27 | Generalisability         | 21 | Discuss the generalisability (external validity) of the study results                                                                                                                                        |
| 28 |                          |    | 11                                                                                                                                                                                                           |
| 29 | <b>Other information</b> |    |                                                                                                                                                                                                              |
| 30 | Funding                  | 22 | Give the source of funding and the role of the funders for the present study and, if applicable, for the original study on which the present article is based                                                |
| 31 |                          |    | 2                                                                                                                                                                                                            |
| 32 |                          |    |                                                                                                                                                                                                              |

\*Give information separately for exposed and unexposed groups.

**Note:** An Explanation and Elaboration article discusses each checklist item and gives methodological background and published examples of transparent reporting. The STROBE checklist is best used in conjunction with this article (freely available on the Web sites of PLoS Medicine at <http://www.plosmedicine.org/>, Annals of Internal Medicine at <http://www.annals.org/>, and Epidemiology at <http://www.epidem.com/>). Information on the STROBE Initiative is available at <http://www.strobe-statement.org>.
