# Supplementary material for: End-of-life outcomes with or without early palliative care: a propensity score matched, population-based cancer cohort study
Source: PubMed Central journal article supplement — BMJ Open. 2021 Feb 12;11(2):e041432. doi: 10.1136/bmjopen-2020-041432 (PMC7883853; doi:10.1136/bmjopen-2020-041432), 2021-02-12
Supplement: bmjopen-2020-041432supp001.pdf [file bmjopen-2020-041432supp001.pdf]

**Appendix S1. Demographics of Early vs. Not-Early before Propensity Score Matching**

|                                                | Before Propensity Score matching          |                                       |      |
|------------------------------------------------|-------------------------------------------|---------------------------------------|------|
|                                                | Not Early Palliative Care<br>(N = 90,347) | Early Palliative Care<br>(N = 53,959) | SD   |
| <b>Variables that were Hard Matched</b>        | <b>N (%)</b>                              | <b>N (%)</b>                          |      |
| Mean Age ± Standard Deviation (SD)             | 72 ± 13                                   | 69 ± 14                               | 0.21 |
| Female                                         | 41,994 (46.5)                             | 27,113 (50.2)                         | 0.59 |
| Cancer Type at Diagnosis                       |                                           |                                       |      |
| Breast                                         | 10,539 (11.7)                             | 5,850 (10.8)                          | 0.03 |
| Colorectal                                     | 12,051 (13.3)                             | 8,579 (15.9)                          | 0.07 |
| Hematology                                     | 10,546 (11.7)                             | 4,150 (7.7)                           | 0.13 |
| Lung                                           | 17,444 (19.3)                             | 13,050 (24.2)                         | 0.12 |
| Prostate                                       | 9,041 (10.0)                              | 4,384 (8.1)                           | 0.07 |
| Stage at Diagnosis                             |                                           |                                       |      |
| Stage III                                      | 6,222 (6.9)                               | 5,858 (10.9)                          | 0.14 |
| Stage IV                                       | 7,347 (8.1)                               | 10,832 (20.1)                         | 0.35 |
| Unavailable                                    | 70,351 (77.9)                             | 32,731 (60.7)                         | 0.38 |
| CHESS Score (when RAI-HC completed)            |                                           |                                       |      |
| No health instability                          | 1,704 (1.9)                               | 2,221 (4.1)                           | 0.13 |
| Low health instability                         | 3,433 (3.8)                               | 5,458 (10.1)                          | 0.25 |
| Moderate health instability                    | 714 (0.8)                                 | 1,761 (3.3)                           | 0.18 |
| Severe health instability                      | 135 (0.1)                                 | 629 (1.2)                             | 0.13 |
| <b>InterRAI Scales (When RAI-HC completed)</b> |                                           |                                       |      |
| Dependent on Activities of Daily Living        | 433 (0.5)                                 | 684 (1.3)                             | 0.08 |
| Minor-major depression                         | 809 (0.9)                                 | 1,797 (3.3)                           | 0.17 |
| Moderate-severe cognitive impairment           | 869 (1.0)                                 | 764 (1.4)                             | 0.04 |
| Moderate-severe pain                           | 606 (0.7)                                 | 1,457 (2.7)                           | 0.16 |
| Caregiver Present at Home                      | 3528 (3.9)                                | 6,970 (12.9)                          | 0.33 |
| <b>Variables within the Propensity Score</b>   |                                           |                                       |      |
| Lowest income quintile                         | 18,686 (20.7)                             | 10,682 (19.8)                         | 0.02 |
| Highest income quintile                        | 17,154 (19.0)                             | 10,492 (19.4)                         | 0.01 |
| Lives in Rural Community                       | 13,597 (15.0)                             | 7,813 (14.5)                          | 0.02 |
| Deyo-Charlson Comorbidity Score (>=1)          | 13,728 (15.2)                             | 9,553 (17.7)                          | 0.10 |
| Had Radiation since diagnosis                  | 43,298 (47.9)                             | 34,226 (63.4)                         | 0.32 |

|                                                                                      |                 |                 |      |
|--------------------------------------------------------------------------------------|-----------------|-----------------|------|
| Had Cancer Surgery since diagnosis                                                   | 37,369 (41.4)   | 23,917 (44.3)   | 0.59 |
| Prior hospital utilization (Mean no. of visits in year 2 to 1 before death $\pm$ SD) | 0.71 $\pm$ 1.09 | 0.96 $\pm$ 1.23 | 0.22 |
| Disease Duration (Diagnosis to death)                                                |                 |                 |      |
| 0-5 years                                                                            | 66,375 (73.5)   | 43,930 (81.4)   | 0.19 |
| 6-11 years                                                                           | 13,907 (15.4)   | 6,467 (12.0)    | 0.10 |
| 12-17 years                                                                          | 5,848 (6.5)     | 2,249 (4.2)     | 0.10 |
| 18+ years                                                                            | 4,217 (4.7)     | 1,313 (2.4)     | 0.12 |
| Health Region                                                                        |                 |                 |      |
| 1                                                                                    | 5,302 (5.9)     | 3,144 (5.8)     | 0.00 |
| 2                                                                                    | 7,628 (8.4)     | 4,408 (8.2)     | 0.01 |
| 3                                                                                    | 4,235 (4.7)     | 3,277 (6.1)     | 0.06 |
| 4                                                                                    | 12,721 (14.1)   | 6,028 (11.2)    | 0.09 |
| 5                                                                                    | 3,220 (3.6)     | 2,413 (4.5)     | 0.05 |
| 6                                                                                    | 6,148 (6.8)     | 3,488 (6.5)     | 0.01 |
| 7                                                                                    | 7,621 (8.4)     | 4,254 (7.9)     | 0.02 |
| 8                                                                                    | 9,094 (10.1)    | 5,355 (9.9)     | 0.00 |
| 9                                                                                    | 10,227 (11.3)   | 6,153 (11.4)    | 0.00 |
| 10                                                                                   | 4,911 (5.4)     | 2,744 (5.1)     | 0.02 |
| 11                                                                                   | 7,808 (8.6)     | 6,117 (11.3)    | 0.09 |
| 12                                                                                   | 3,531 (3.9)     | 2,424 (4.5)     | 0.03 |
| 13                                                                                   | 5,795 (6.4)     | 3,079 (5.7)     | 0.03 |
| 14                                                                                   | 2,025 (2.2)     | 1,040 (1.9)     | 0.02 |

## Appendix S2. Aggressive Care Measures comparing Early vs. Late and Early vs. Never

|                                                                 | RAI NO                                  |                                        |                                                                  |      | RAI YES                                |                                        |                                                                  |      |
|-----------------------------------------------------------------|-----------------------------------------|----------------------------------------|------------------------------------------------------------------|------|----------------------------------------|----------------------------------------|------------------------------------------------------------------|------|
|                                                                 | Early Palliative Care<br>N = 28,285 (%) | Late Palliative Care<br>N = 28,285 (%) | Absolute Risk Difference (%)<br>(Early vs Late Palliative Care)  | SD   | Early Palliative Care<br>N = 2,323 (%) | Late Palliative Care<br>N = 2,323 (%)  | Absolute Risk Difference (%)<br>(Early vs Late Palliative Care)  | SD   |
| <b>Late PC vs. Early PC</b>                                     |                                         |                                        |                                                                  |      |                                        |                                        |                                                                  |      |
| Death in acute care hospital                                    | 10,788 (38.1)                           | 13,109 (46.3)                          | -8.2                                                             | 0.17 | 831 (35.8)                             | 1,152 (49.6)                           | -13.8                                                            | 0.28 |
| Aggressive care (any one or combination of the following three) | 14,763 (52.2)                           | 17,379 (61.4)                          | -9.2                                                             | 0.19 | 1,135 (48.9)                           | 1,344 (57.9)                           | -9.0                                                             | 0.18 |
| At least 1 ED visits within last 30 days                        | 12,232 (43.2)                           | 14,552 (51.4)                          | -8.2                                                             | 0.16 | 949 (40.9)                             | 1,141 (49.1)                           | -8.2                                                             | 0.17 |
| Any hospital admission within last 30 days                      | 12,750 (45.1)                           | 15,492 (54.8)                          | -9.7                                                             | 0.19 | 992 (42.7)                             | 1,223 (52.6)                           | -9.9                                                             | 0.20 |
| Any ICU admission within last 30 days                           | 1,022 (3.6)                             | 1,379 (4.9)                            | -1.3                                                             | 0.06 | 53 (2.3)                               | 111 (4.8)                              | -2.5                                                             | 0.14 |
| <b>Never PC vs. Early PC</b>                                    |                                         |                                        |                                                                  |      |                                        |                                        |                                                                  |      |
|                                                                 | Early Palliative Care<br>N = 7,953 (%)  | Never Palliative Care<br>N = 7,953 (%) | Absolute Risk Difference (%)<br>(Early vs Never Palliative Care) | SD   | Early PC<br>N = 1,263 (%)              | Never Palliative Care<br>N = 1,263 (%) | Absolute Risk Difference (%)<br>(Early vs Never Palliative Care) | SD   |
| Death in acute care hospital                                    | 3,035 (38.2)                            | 4,325 (54.4)                           | -16.2                                                            | 0.33 | 447 (35.4)                             | 599 (47.4)                             | -12.0                                                            | 0.25 |
| Aggressive care (any one or combination of the following three) | 4,059 (51.0)                            | 5,207 (65.5)                           | -14.5                                                            | 0.30 | 583 (46.2)                             | 745 (59.0)                             | -12.8                                                            | 0.26 |
| At least 1 ED visits within last 30 days                        | 3,318 (41.7)                            | 4,523 (56.9)                           | -15.2                                                            | 0.31 | 505 (40.0)                             | 686 (54.3)                             | -14.3                                                            | 0.29 |
| Any hospital admission within last 30 days                      | 3,536 (44.5)                            | 4,426 (55.7)                           | -11.2                                                            | 0.23 | 500 (39.6)                             | 640 (50.7)                             | -11.1                                                            | 0.22 |
| Any ICU admission within last 30 days                           | 277 (3.5)                               | 1,510 (19.0)                           | -15.5                                                            | 0.51 | 30 (2.4)                               | 163 (12.9)                             | -10.5                                                            | 0.40 |

\*McNemar's test was significant to &lt;0.0001 for all measures

**Appendix S3. Supportive Home Care Measures comparing Early vs. Late and Early vs. Never**

|                                                                      | RAI NO                                  |                                        |                                                                 |      | RAI YES                                |                                       |                                                                 |      |
|----------------------------------------------------------------------|-----------------------------------------|----------------------------------------|-----------------------------------------------------------------|------|----------------------------------------|---------------------------------------|-----------------------------------------------------------------|------|
|                                                                      | Early Palliative Care<br>N = 28,285 (%) | Late Palliative Care<br>N = 28,285 (%) | Absolute Risk Difference (%)<br>(Early vs Late Palliative Care) | SD   | Early Palliative Care<br>N = 2,323 (%) | Late Palliative Care<br>N = 2,323 (%) | Absolute Risk Difference (%)<br>(Early vs Late Palliative Care) | SD   |
| <b>Late PC vs. Early PC</b>                                          |                                         |                                        |                                                                 |      |                                        |                                       |                                                                 |      |
| Supportive home care (any one or combination of the following three) | 17,552 (62.1)                           | 13,736 (48.6)                          | 13.5                                                            | 0.27 | 1,340 (57.7)                           | 656 (28.2)                            | 29.5                                                            | 0.62 |
| Physician house call in last 30 days                                 | 7,833 (27.7)                            | 6,061 (21.4)                           | 6.3                                                             | 0.15 | 582 (25.1)                             | 341 (14.7)                            | 10.4                                                            | 0.26 |
| Palliative homecare nursing at home in last 30 days                  | 16,083 (56.9)                           | 12,320 (43.6)                          | 13.3                                                            | 0.27 | 1,213 (52.2)                           | 494 (21.3)                            | 30.9                                                            | 0.68 |
| Palliative personal support nursing at home in last 30 days          | 10,745 (38.0)                           | 7,954 (28.1)                           | 9.9                                                             | 0.21 | 955 (41.4)                             | 374 (16.1)                            | 25.3                                                            | 0.58 |
| <b>Never PC vs. Early PC</b>                                         |                                         |                                        |                                                                 |      |                                        |                                       |                                                                 |      |
| Supportive home care (any one or combination of the following three) | 4,639 (58.3)                            | 0                                      | -                                                               | -    | 672 (53.2)                             | 0                                     | -                                                               | -    |
| Physician house call in last 30 days                                 | 1,921 (24.2)                            | 0                                      | -                                                               | -    | 277 (21.9)                             | 0                                     | -                                                               | -    |
| Palliative homecare nursing at home in last 30 days                  | 4,287 (53.9)                            | 0                                      | -                                                               | -    | 609 (48.2)                             | 0                                     | -                                                               | -    |
| Palliative personal support nursing at home in last 30 days          | 2,983 (37.5)                            | 0                                      | -                                                               | -    | 494 (39.1)                             | 0                                     | -                                                               | -    |

\*McNemar's test was significant to &lt;0.0001 for all measures
